# Supplementary material for: Optimal wideband digital fractional-order differentiators using gradient based optimizer
Source: PeerJ Comput Sci. 2024 Oct 14;10:e2341. doi: 10.7717/peerj-cs.2341 (PMC11639271; doi:10.7717/peerj-cs.2341)
Supplement: Supplemental Information 2 — The outcomes are written in three sheets, each for a metaheuristic algorithm among (RCGA, PSO, and GBO). Since the design example involves three design cases, the outcomes within each sheet are given in 12 columns, namely (A-B-C-D for case 1, F-G-H-I for case 2, and K-L-M-N for case 3). The first two columns for each case (e.g., A and B) are corresponding to alpha=1/2, and the last two columns (e.g., C and D) are corresponding to alpha=1/4. The first column contains the maximum relative magnitude error (delta_r), and the second column contains the maximum relative phase error (delta_phi). [file peerj-cs-10-2341-s002.xlsx]

## Sheet: RCGA
-9.4	12.03	-16.96	11.8		-9.73	34.89	-21.54	16.92		-24.4	20.69	-15.14	5.34
-2.6149	26.8882	-14.8247	15.4153		-9.188	30.7923	-12.1406	16.3796		-15.5195	2.1197	-9.1576	6.1958
-9.2583	16.1419	-11.8444	11.5795		-3.6079	30.0403	-19.2792	17.7338		-15.2963	16.8641	-14.9158	5.4018
-8.1391	12.65	-9.1683	15.8469		-7.0726	23.2233	-10.8187	15.6117		-17.4475	21.2618	-13.2727	6.326
-1.236	21.657	-15.648	17.067		-2.8067	31.7827	-18.0194	14.2487		-17.3045	8.0272	-12.3102	4.3752
-5.606	23.4904	-15.2554	19.5162		-5.8662	33.969	-16.2796	15.2957		-23.9914	16.1784	-13.3826	11.7764
-4.72	16.5747	-14.5425	16.6649		-7.16	23.4369	-9.3946	16.6931		-22.9197	15.7384	-9.623	6.1608
-7.9054	23.8086	-15.8471	18.874		-2.3519	24.5561	-9.0377	19.5032		-22.6015	21.1302	-9.9026	9.7514
-6.2542	12.7988	-9.1174	25.1537		-1.1432	26.9157	-18.0279	18.8193		-18.2921	2.3324	-12.1058	6.924
-1.4483	24.1852	-14.3296	15.4566		-6.056	29.2674	-11.7977	15.1916		-17.1156	7.554	-14.011	8.1909
-3.3364	27.7278	-7.0106	19.3574		-3.7933	29.7922	-9.2885	18.3621		-21.7766	2.1426	-13.3965	4.6073
-8.3895	21.7028	-13.706	12.2237		-2.7	27.0627	-10.4467	15.7255		-20.8697	2.3351	-7.5014	4.5562
-4.5635	26.7941	-13.7973	13.5185		-9.1779	23.5865	-17.2294	15.0588		-15.9178	6.6107	-14.4914	12.8196
-3.4153	22.7358	-8.4941	12.4257		-4.4565	26.574	-17.32	17.78		-22.6001	6.6523	-9.3801	5.8905
-1.2402	27.9875	-12.3074	21.0355		-4.0671	25.4657	-18.9396	17.4894		-21.742	20.3786	-8.8113	5.4899
-5.7628	12.4526	-12.8552	15.5621		-2.8389	25.9878	-13.5567	19.1856		-22.9067	21.1622	-8.3946	5.9185
-5.985	25.9118	-9.088	16.2029		-1.8886	23.6692	-14.3322	17.985		-22.8216	14.8901	-8.9359	10.3158
-7.5028	24.3107	-7.2108	24.1942		-4.4232	25.6481	-16.7462	17.9487		-21.6239	3.0948	-13.6249	8.3569
-9.3004	20.8904	-8.4116	19.8102		-9.3646	24.17	-19.1238	16.7497		-20.4901	2.7473	-9.392	8.0988
-1.5264	28.2883	-9.0436	10.8477		-5.5994	33.2676	-11.402	14.5169		-15.8462	20.7445	-9.0984	8.6308
-9.1398	19.7933	-10.9249	24.49		-3.9158	33.6213	-15.9305	17.8848		-19.1907	3.6186	-14.884	6.0924
-9.2336	27.5899	-11.9387	13.9391		-4.1757	24.3712	-17.6129	15.6359		-22.8567	21.3004	-6.1875	5.0178
-4.8598	23.155	-10.3601	22.3468		-3.8893	27.891	-11.9277	15.7525		-18.1717	8.4632	-8.3717	11.7929
-3.6289	21.845	-9.1247	13.0391		-5.3065	28.5112	-10.6509	17.5177		-21.2518	19.393	-6.977	4.3246
-8.4178	21.6529	-8.1431	11.3108		-6.8335	23.6844	-9.8388	19.2142		-16.2112	10.1357	-12.0621	6.1468
-7.0531	29.8851	-8.7443	18.1176		-5.5254	27.8108	-18.9468	18.8382		-21.4233	21.7397	-14.9902	4.5446
-8.296	21.8751	-10.0142	11.8893		-8.8216	32.0465	-10.0153	19.3912		-20.2647	16.5167	-9.3886	5.5453
-6.0629	24.7972	-14.2594	23.4633		-7.0576	32.5086	-9.4348	18.0621		-15.9838	6.4534	-7.2804	6.5813
-1.459	23.9143	-7.4325	16.4564		-8.6702	23.2706	-17.5574	18.6143		-21.6967	18.9997	-12.0076	10.4529
-6.9606	24.7213	-7.8259	16.7501		-6.9252	31.8368	-11.6783	13.9377		-19.5902	19.8332	-12.8946	4.9104
-2.895	16.4692	-8.9407	23.3856		-4.774	30.193	-11.829	19.5362		-22.4292	1.8369	-13.0872	10.2364
-2.1197	22.626	-11.7038	25.9916		-7.3049	29.3605	-13.1596	19.2375		-20.2459	15.561	-9.4511	7.0414
-2.4432	23.1315	-16.621	22.701		-2.7009	23.9328	-10.2083	18.1833		-20.04	9.3419	-13.6721	5.6028
-8.788	12.4985	-9.1369	20.547		-5.4968	23.579	-16.6237	19.1736		-15.2899	3.0725	-7.0916	4.2244
-6.7561	14.1151	-14.3702	11.1737		-5.228	27.0154	-16.9067	19.4634		-20.3967	8.6109	-13.9167	8.3021
-2.2835	19.523	-10.1593	11.2358		-6.1649	28.9415	-20.8952	19.9242		-19.4613	5.5701	-15.0949	5.2846
-3.699	26.2658	-9.3019	16.1286		-6.3129	31.3984	-14.8244	13.22		-16.6975	1.3295	-10.1972	6.3848
-9.2052	16.6704	-12.7109	23.9233		-3.2258	29.8759	-15.4722	18.5865		-20.273	12.1327	-6.2977	6.1756
-5.9627	15.0444	-8.2019	14.5346		-1.8495	33.0919	-16.8449	19.6885		-17.7453	1.9403	-12.9171	8.1618
-8.1101	25.8926	-12.5411	12.2884		-1.7876	32.9542	-9.3945	15.5355		-20.8393	9.3537	-11.3108	9.6358
-2.0323	17.3549	-11.6805	17.459		-7.3285	31.6665	-16.5135	14.896		-21.9584	21.7563	-14.3237	6.1955
-6.7956	17.7635	-8.6509	17.2725		-7.7887	30.2461	-10.5307	16.8947		-19.3929	20.355	-6.1756	11.7618
-3.5656	23.3465	-12.0373	25.673		-5.2578	25.5377	-16.2328	13.6126		-16.1661	17.8776	-11.9264	7.8377
-3.801	14.5215	-10.367	16.1352		-8.971	23.249	-9.005	16.9483		-16.5461	2.2189	-9.504	5.5506
-8.2125	25.0794	-16.001	18.3082		-5.59	29.3572	-10.0976	17.0293		-21.2096	21.6769	-10.7357	4.7051
-1.5293	27.1546	-16.6469	16.19		-6.054	25.7677	-17.9773	18.3901		-19.0499	7.8269	-14.6249	9.5023
-6.561	13.5194	-10.0821	12.4521		-6.74	25.5567	-15.6432	19.4088		-20.7477	5.0663	-7.0122	6.6098
-4.6827	14.9124	-13.6044	21.7496		-3.0346	25.5284	-13.4639	18.9707		-21.5452	2.7553	-13.3134	4.9879
-1.9556	17.4218	-10.1431	23.3797		-5.138	32.2412	-20.0845	19.998		-18.5388	8.8437	-11.6149	6.7358
-5.8214	20.0697	-13.1852	17.0112		-9.4217	29.4418	-19.7747	19.6922		-18.2532	17.2628	-7.1822	7.3868
-6.4023	12.4069	-10.249	22.3202		-6.5179	30.9152	-10.5772	14.9089		-22.868	20.9558	-7.8526	12.2273
-1.1769	25.0139	-15.3849	18.8757		-6.733	26.2677	-13.3638	16.3906		-20.1694	6.4866	-8.0941	11.9261
-1.1116	20.9605	-13.9735	10.5068		-5.7029	33.1304	-13.1176	16.3679		-20.7983	18.3748	-6.5059	12.1669
-5.0711	17.7247	-8.7135	21.2743		-4.0669	30.4148	-15.6773	18.1847		-18.6513	20.7782	-8.2388	7.5986
-9.0195	28.2312	-10.4875	20.2215		-1.4384	28.2102	-15.7856	18.5932		-22.8718	10.0978	-12.1115	6.5067
-5.0399	17.7043	-12.612	11.78		-1.8621	24.975	-14.1417	13.5186		-19.5638	18.7037	-9.2001	10.6079
-1.2886	14.3537	-15.1952	22.9515		-9.2782	23.6037	-13.0127	19.0445		-15.6223	17.4351	-9.4439	12.4697
-8.4618	14.3652	-13.9225	16.8596		-8.1249	25.9671	-17.3451	15.1714		-17.0584	8.4857	-6.17	12.838
-8.597	13.5739	-8.8094	13.2249		-6.5811	33.2202	-11.404	17.3155		-22.3266	16.0888	-11.4208	7.3168
-2.5413	12.4514	-10.5039	17.0432		-6.6988	30.5999	-16.5025	17.0886		-18.4384	8.3193	-11.0079	6.6705
-4.3142	24.8879	-12.0352	21.4607		-2.5282	24.0327	-17.8901	15.611		-20.6488	2.7879	-13.7331	6.1372
-5.398	17.9473	-7.6056	13.6099		-2.1849	27.0544	-12.9613	13.3805		-15.3101	3.8556	-11.0293	6.0978
-5.166	26.8676	-10.141	13.0255		-2.6755	33.8505	-16.9714	17.6653		-22.0439	8.7686	-8.4942	8.845
-6.4234	16.7414	-9.7606	13.6709		-2.987	23.3014	-11.7846	17.3914		-21.6615	3.8731	-15.0053	12.9074
-9.3712	21.6633	-11.1888	22.0258		-5.724	33.0878	-12.4477	17.128		-23.9905	2.5649	-7.6356	12.0959
-1.78	29.9595	-9.0914	18.1892		-3.9301	27.3722	-15.6017	13.212		-18.6946	8.1468	-6.0993	9.0447
-4.965	12.7604	-15.7664	15.0857		-2.6932	29.504	-12.1962	13.1604		-18.2734	5.6407	-8.6337	8.612
-9.396	29.5524	-12.6935	14.5011		-7.7449	33.1433	-12.2725	16.5058		-18.8998	6.0495	-9.2023	6.6594
-8.7469	24.6572	-14.3952	15.3038		-4.581	26.1057	-15.7491	14.8976		-21.8665	7.9488	-7.6084	11.2174
-6.3308	28.491	-15.3782	25.5713		-6.0771	23.5715	-19.8221	19.0438		-23.8823	19.4043	-9.7509	9.9798
-6.7153	16.9732	-12.8681	13.3588		-2.8763	25.1748	-11.0856	14.1407		-20.7993	4.0872	-7.3344	12.5183
-6.554	29.6177	-9.3532	17.9579		-6.0416	32.2485	-14.0836	16.828		-22.3346	8.4895	-14.1214	10.2353
-1.2442	15.9177	-11.9869	21.21		-7.9997	25.428	-15.3126	14.721		-19.63	6.307	-11.2055	5.4612
-8.2974	25.04	-15.7253	22.6489		-6.3164	27.9604	-12.5421	13.0118		-21.4409	20.5533	-15.1328	11.1212
-2.8867	23.0872	-9.5695	13.4457		-4.4018	28.7068	-16.0109	13.5254		-18.9152	8.451	-7.3173	6.606
-7.4345	22.1103	-12.942	21.1164		-5.0625	27.5842	-12.8021	14.1664		-17.8258	1.3122	-14.2503	10.5098
-6.4734	14.5993	-8.334	21.057		-5.6602	27.1799	-14.9595	15.2377		-20.3027	18.1508	-12.6732	4.3578
-5.416	22.613	-15.9298	17.8452		-9.4361	27.9603	-20.7234	18.1818		-23.6853	18.7712	-11.1701	7.932
-3.0105	12.6662	-13.9044	19.188		-1.0913	26.4461	-12.2029	13.215		-19.7292	6.1816	-10.5543	4.2046
-2.146	19.3831	-10.6441	12.0454		-2.5866	33.5262	-10.2225	18.7115		-17.3543	5.0605	-14.4589	10.4002
-4.8074	28.0896	-14.4743	14.1887		-4.141	24.8557	-17.5303	18.7273		-16.9544	15.6812	-12.9239	4.5527
-1.854	15.1778	-11.0994	18.9093		-7.1573	32.1748	-19.917	13.4176		-18.439	12.2241	-12.7043	8.1809
-2.8654	19.9981	-16.9257	23.4861		-3.2524	30.6158	-14.1041	19.7448		-16.9972	8.1927	-6.4326	4.711
-6.4954	28.9759	-14.0384	13.4159		-5.939	26.9292	-9.2924	18.9775		-21.6798	2.0572	-15.0625	5.6272
-3.3334	29.8588	-14.0946	24.8126		-7.6803	30.6818	-13.9086	19.5176		-19.7606	13.2881	-12.0821	11.6353
-7.6699	19.9763	-7.3728	25.774		-3.2299	23.7869	-11.9876	19.1179		-15.839	20.4707	-7.9718	4.1555
-3.651	20.9981	-8.1589	15.228		-7.6567	32.9086	-10.7456	17.6403		-19.3296	12.5673	-8.8257	4.6925
-7.3459	14.0289	-7.6232	16.0404		-8.8199	27.1754	-14.5962	19.72		-21.9256	2.6968	-8.6196	5.604
-6.092	15.3927	-12.5319	12.5804		-1.1527	31.31	-11.287	13.1181		-19.1356	12.1589	-13.5745	9.7021
-9.1493	13.8621	-13.7034	18.0861		-7.1555	32.5185	-15.0508	19.3263		-20.9011	6.6471	-7.6289	11.353
-1.3955	26.431	-7.5278	11.0669		-2.6628	28.4931	-18.3728	17.4653		-16.9499	4.9406	-8.6308	8.4191
-7.4318	16.3025	-9.0059	16.2354		-4.2362	28.5795	-16.7613	16.3264		-19.6684	17.3708	-10.1796	7.0749
-9.311	15.6595	-10.2647	14.6144		-8.7997	32.5658	-17.9039	13.7868		-23.8606	8.1146	-10.6514	11.0731
-7.9395	23.3551	-14.7467	15.3651		-3.6458	29.0926	-14.3694	16.456		-15.9933	14.855	-8.5403	10.7327
-7.2717	13.8012	-13.7661	15.1465		-4.756	30.4273	-16.8788	14.4156		-19.2058	10.365	-6.343	11.505
-3.9737	22.5985	-10.7379	19.3615		-2.9483	29.951	-19.097	19.1027		-21.45	20.9197	-10.7008	9.0838
-9.0872	19.7128	-14.7496	10.1444		-8.8215	28.5038	-10.0237	14.1037		-19.097	19.8972	-8.2181	12.9446
-5.449	13.942	-10.3326	13.6743		-5.2242	23.2125	-15.9609	18.5838		-18.385	17.3986	-9.2447	12.3729
-7.4319	25.8539	-9.7031	15.6246		-9.043	32.3797	-15.928	17.182		-15.0486	8.8279	-9.2633	11.7735
-3.9634	17.5927	-7.2285	14.8296		-7.1771	31.12	-17.5933	16.0462		-17.6839	10.2965	-7.2845	9.1355

## Sheet: PSO
-12.22	30.83	-28.89	23.7		-11.04	33.26	-25.41	15.1		-32.71	1.369	-20.65	20.65
-11.8944	15.702	-20.927	16.5972		-6.8569	30.9264	-17.5395	18.3642		-21.145	16.7409	-14.8162	14.8162
-7.8631	27.3741	-19.0853	21.6121		-10.7899	25.427	-21.848	16.1176		-30.3181	2.4454	-19.4822	19.4822
-4.3088	14.1173	-22.6428	12.0847		-6.6	33.7794	-23.4866	17.7815		-24.4032	4.0944	-12.9826	12.9826
-6.4317	15.5142	-26.2936	17.9603		-8.6711	25.2755	-16.8844	27.5224		-28.812	16.2665	-15.5231	15.5231
-5.2732	27.9852	-19.228	21.3677		-10.6897	25.9075	-20.3421	14.2976		-28.5508	14.4715	-15.8007	15.8007
-11.1269	18.6016	-22.2732	13.5139		-4.5934	23.5714	-16.0993	16.0679		-21.7241	8.398	-17.9153	17.9153
-11.2325	20.6035	-26.7144	16.6244		-4.6837	28.8593	-23.7681	25.1366		-27.239	9.8931	-17.9384	17.9384
-8.2101	26.5873	-23.6183	19.6426		-10.6796	31.8496	-24.6659	13.061		-26.9358	8.8458	-16.9137	16.9137
-11.455	15.3352	-18.3115	11.8832		-4.0341	27.9367	-21.9726	14.1884		-27.1293	10.5199	-14.165	14.165
-5.6984	17.2395	-27.2323	23.035		-5.7231	26.3447	-19.6925	26.3658		-26.2162	4.0172	-13.902	13.902
-9.7776	25.4886	-23.4766	19.9355		-8.0972	33.5064	-20.8259	15.222		-24.5435	8.8179	-15.7536	15.7536
-7.7702	29.6249	-27.9254	13.9667		-7.239	27.8381	-18.288	28.865		-24.6453	12.2964	-14.0066	14.0066
-11.097	14.973	-22.1048	13.7532		-6.1574	28.2564	-15.8994	25.54		-29.2477	19.5303	-15.7868	15.7868
-10.4418	16.0295	-19.9785	11.8039		-4.3105	24.3211	-19.2695	18.6477		-27.1326	6.0418	-14.4584	14.4584
-5.9288	12.6316	-26.0875	16.7845		-6.9581	33.3223	-15.67	27.9476		-21.9754	15.348	-18.4037	18.4037
-11.2311	20.1934	-25.5717	14.5824		-10.5869	23.5639	-18.0372	28.6524		-29.2668	1.3564	-15.5308	15.5308
-5.965	27.7928	-24.0465	10.0285		-8.4846	30.9639	-17.7904	13.5111		-24.3454	2.9164	-19.3128	19.3128
-5.4521	26.3455	-21.1523	22.4991		-5.5881	32.4575	-22.6529	26.3286		-23.7348	2.4742	-17.1316	17.1316
-11.8949	24.6825	-21.5916	22.6964		-8.7848	23.6458	-18.1084	24.4458		-21.8879	9.6205	-16.0637	16.0637
-9.6468	18.6108	-20.449	10.7855		-5.7282	25.6244	-16.3345	19.027		-24.5709	12.1729	-20.6438	20.6438
-10.0254	21.4888	-24.8746	12.4197		-6.1605	31.6799	-19.0953	16.1219		-24.7406	18.2442	-16.9777	16.9777
-5.4307	18.9225	-18.8542	10.3337		-6.9006	23.8138	-18.9842	22.8563		-30.5207	1.9406	-14.0617	14.0617
-7.0909	15.2807	-26.671	10.4936		-4.7094	27.0315	-25.3276	22.6735		-31.3056	9.6493	-12.0659	12.0659
-10.9473	21.6282	-19.3826	18.8807		-10.1668	29.5941	-23.6467	19.4685		-28.764	19.9128	-19.7011	19.7011
-9.3022	18.0663	-24.874	21.609		-5.3903	23.3236	-24.2891	20.3063		-27.9051	7.5422	-13.9547	13.9547
-9.22	18.6651	-21.3115	16.3003		-8.531	24.4149	-18.3777	24.0201		-32.1327	8.8745	-17.5353	17.5353
-11.0431	18.3997	-18.8318	18.4638		-7.2956	25.0949	-24.6236	29.318		-21.7013	14.9006	-16.0556	16.0556
-7.3634	15.466	-21.5638	22.6922		-6.7072	27.8782	-18.1039	22.1735		-28.2419	14.8982	-17.3268	17.3268
-10.228	16.1465	-27.3223	13.7765		-6.3903	31.7261	-16.8277	27.2954		-21.106	12.1941	-20.4136	20.4136
-5.5654	15.4326	-21.3353	10.8681		-7.5559	23.8387	-15.677	26.898		-23.7528	17.3589	-16.2575	16.2575
-9.398	18.6582	-22.0325	23.2455		-7.1039	25.5514	-19.8171	25.9338		-28.2313	14.0435	-20.3541	20.3541
-6.3392	24.0409	-27.8431	22.3348		-9.6429	23.1134	-19.5202	24.995		-30.999	3.5504	-14.1338	14.1338
-4.3031	13.4009	-18.5832	22.1911		-4.1706	23.6895	-22.0051	20.7724		-20.0271	13.1754	-14.412	14.412
-8.2099	13.6029	-25.335	23.7497		-5.9727	23.7481	-20.0937	13.7227		-22.2989	5.5946	-15.8588	15.8588
-6.376	23.5704	-25.8295	18.6659		-8.0321	32.1205	-25.1678	28.3406		-25.1864	19.176	-15.4138	15.4138
-6.994	19.1181	-22.1115	15.5483		-5.0264	23.5646	-18.0925	18.0566		-31.1626	7.8781	-17.6108	17.6108
-11.6803	25.636	-22.9696	21.5396		-5.038	24.95	-15.719	24.4571		-29.2116	15.7219	-13.1759	13.1759
-7.3655	20.4243	-28.1406	10.17		-4.7268	23.8749	-21.2689	29.0168		-21.8783	17.4385	-16.2462	16.2462
-5.9546	23.8448	-21.8261	13.1005		-4.3272	23.8788	-15.6654	21.9111		-32.0434	7.875	-14.3243	14.3243
-10.648	21.5379	-24.2126	23.0365		-4.9674	27.8181	-15.1588	18.312		-29.2735	8.8728	-13.5029	13.5029
-4.9654	18.1866	-27.6022	19.6556		-8.8413	26.5137	-17.5429	24.9065		-25.9702	9.308	-14.0626	14.0626
-6.9802	25.7689	-24.7305	23.0096		-5.0805	23.2301	-25.0303	14.1694		-20.6562	11.691	-14.9	14.9
-10.1172	21.0709	-28.8421	23.2709		-6.6261	26.1142	-20.3933	20.1265		-27.4593	11.4927	-19.4467	19.4467
-11.8465	26.9767	-25.2772	22.0346		-9.4999	29.3964	-22.2875	28.3205		-31.4353	4.319	-13.744	13.744
-10.3616	15.7696	-28.0912	18.5182		-6.7808	25.4656	-24.2132	27.4705		-21.7081	9.2196	-16.9629	16.9629
-11.9639	20.9457	-20.2926	21.9809		-8.2922	25.0694	-20.4435	13.4716		-24.9359	17.5971	-13.5976	13.5976
-8.5988	13.3622	-21.495	10.101		-5.7065	28.9437	-21.0352	15.9817		-28.0159	14.6608	-14.6861	14.6861
-5.7051	20.8807	-26.8459	10.7694		-5.5705	28.2911	-24.3699	27.285		-30.2248	14.3651	-17.1966	17.1966
-9.232	14.9628	-26.7194	11.4983		-6.6496	27.1942	-15.0574	28.4781		-25.0383	19.7336	-18.2083	18.2083
-6.7888	28.5211	-20.0014	13.9338		-10.729	27.0596	-18.7786	23.7857		-24.0569	4.3077	-12.9464	12.9464
-6.8314	26.0035	-21.1542	23.7065		-6.1734	24.4018	-21.6567	19.7178		-26.7401	10.626	-16.2801	16.2801
-8.8241	25.0232	-18.94	18.9884		-9.7821	28.3086	-18.0296	21.2943		-25.9112	18.9618	-14.3371	14.3371
-9.7568	13.3548	-18.261	17.5611		-7.7977	29.9971	-20.7126	24.5463		-21.306	4.8507	-19.3233	19.3233
-4.552	28.5794	-18.4773	25.7853		-6.8334	28.8751	-18.6371	22.5373		-29.9545	4.2042	-19.4521	19.4521
-7.7384	23.1469	-18.6926	22.8654		-7.664	32.36	-21.7532	19.1526		-28.1578	5.9541	-12.4221	12.4221
-7.9998	18.7133	-23.1204	17.3932		-9.5718	25.2533	-16.784	26.467		-26.549	21.345	-18.6286	18.6286
-11.42	28.1253	-22.6116	25.821		-5.7705	24.3399	-16.9072	18.6483		-30.0392	13.3403	-15.9796	15.9796
-10.1177	20.342	-18.2172	25.3483		-8.0577	33.2268	-19.4615	16.2193		-21.4602	13.3403	-20.01	20.01
-6.3051	27.3063	-24.7087	14.849		-6.6787	32.845	-18.1959	17.1791		-20.5588	8.86	-18.4334	18.4334
-10.5011	18.462	-23.2032	16.1666		-5.6325	25.9997	-22.5036	13.7571		-32.1255	19.7884	-19.1771	19.1771
-12.0154	23.6889	-22.7997	11.4385		-10.4	31.2489	-21.1496	24.5498		-24.1669	13.291	-18.7771	18.7771
-10.472	17.3541	-25.8525	19.1618		-8.807	30.7495	-21.6804	15.9788		-27.3017	12.5256	-12.0368	12.0368
-9.3864	28.6885	-25.1344	10.1605		-8.2016	32.0718	-25.2145	15.2138		-26.5623	17.839	-12.7277	12.7277
-7.4538	23.9918	-28.2292	11.1711		-8.5804	33.0843	-20.9514	27.6827		-24.6512	6.4645	-17.2593	17.2593
-10.4519	22.6205	-20.9273	20.6287		-5.0598	23.7782	-22.9515	18.7051		-21.1313	20.2813	-20.0717	20.0717
-5.5927	28.7727	-26.2019	21.8605		-5.4407	25.951	-19.5928	21.1086		-25.3801	18.39	-14.5224	14.5224
-9.2791	13.5056	-21.9778	16.4879		-10.7477	25.9908	-16.2264	18.0974		-27.5943	8.5815	-14.6445	14.6445
-8.6699	15.3788	-19.9919	10.6429		-5.7928	28.2141	-20.3939	22.2318		-22.6839	16.4806	-15.4179	15.4179
-11.8973	27.2575	-27.3173	24.3016		-4.6745	25.2792	-18.7954	20.0035		-29.6448	16.7516	-20.1583	20.1583
-4.2171	28.5508	-27.3918	13.4634		-9.5428	26.4351	-20.7126	15.5342		-31.4355	19.3064	-12.5463	12.5463
-6.6311	18.5616	-21.7356	13.3978		-10.8407	23.6165	-22.5687	20.6295		-20.5748	7.8879	-17.3829	17.3829
-7.501	24.6496	-21.4505	22.5067		-9.4712	24.472	-15.6898	16.416		-22.1813	13.6352	-18.1808	18.1808
-8.9783	17.3801	-28.2654	15.7724		-7.8525	24.8862	-16.0682	23.6423		-26.0429	10.9758	-19.3395	19.3395
-8.2471	26.3683	-23.5166	20.3671		-7.4113	27.8021	-22.013	19.497		-29.1235	7.4159	-13.4342	13.4342
-9.3622	26.4079	-21.1998	11.2414		-6.5716	24.3045	-18.7528	21.2762		-21.9827	7.2694	-20.4226	20.4226
-8.2548	16.1675	-18.1487	19.1578		-6.3149	29.3612	-21.0319	18.1882		-20.08	8.5048	-14.9536	14.9536
-8.889	12.5201	-27.5266	15.8209		-10.1277	33.0713	-21.4751	16.6938		-24.027	7.7247	-20.3639	20.3639
-6.002	28.1007	-20.6979	14.1189		-6.3523	33.1746	-21.0688	28.7961		-28.5428	4.1471	-13.2739	13.2739
-11.1187	21.1007	-24.1437	21.7537		-9.366	31.5885	-17.5195	23.5115		-32.6577	11.5629	-15.2207	15.2207
-7.1338	21.9352	-20.797	12.7308		-9.6806	23.9881	-21.3486	23.2659		-25.9045	6.946	-15.4632	15.4632
-4.257	25.8581	-19.5229	20.3406		-10.9699	29.1124	-15.3373	25.1483		-23.3239	17.7455	-14.4671	14.4671
-11.1468	27.3505	-21.5667	12.2025		-6.548	24.834	-20.4638	28.9099		-30.9442	1.413	-17.0195	17.0195
-5.2255	23.1505	-19.1585	12.2793		-5.3337	27.8471	-22.3158	21.8054		-23.6232	15.241	-18.1494	18.1494
-11.5328	13.4072	-25.6085	19.68		-8.9663	23.4927	-23.8883	28.7773		-27.9231	5.9345	-16.5209	16.5209
-5.3352	25.8502	-18.3602	16.3534		-7.4609	29.9625	-22.7479	24.5615		-29.9451	6.7255	-13.7999	13.7999
-8.612	25.1525	-23.0663	13.4894		-9.7113	24.3488	-16.1615	17.6614		-24.7039	7.6263	-20.4302	20.4302
-11.1321	24.9032	-28.6286	20.619		-8.6615	24.2082	-17.8346	19.842		-26.9133	14.0041	-20.1636	20.1636
-6.5548	25.668	-21.4504	20.3723		-7.0281	25.9438	-22.2808	16.6953		-29.7039	6.5632	-15.2453	15.2453
-6.4044	18.3648	-23.0483	12.4262		-4.5881	25.9774	-18.6754	29.3739		-21.614	21.317	-13.598	13.598
-7.6653	12.6885	-19.1708	16.6856		-5.3927	27.7846	-21.1579	17.4109		-26.369	9.0314	-19.3621	19.3621
-9.4413	23.6505	-23.1545	15.1257		-6.0984	30.2315	-22.7482	19.9941		-25.7736	4.0926	-18.8469	18.8469
-7.4133	20.6436	-21.977	14.7945		-8.0134	33.952	-22.6871	26.8164		-26.5314	7.9244	-20.3554	20.3554
-11.7478	13.6694	-26.024	16.6584		-9.4665	26.8671	-21.3668	25.3332		-25.9748	8.6628	-12.6334	12.6334
-11.3253	26.2926	-25.7309	10.6971		-9.3547	25.6949	-22.9941	25.1008		-20.055	3.9198	-19.4276	19.4276
-6.4462	28.2865	-27.4944	15.4282		-10.393	31.1014	-22.2299	19.1385		-29.9659	12.9297	-18.4881	18.4881
-5.2616	18.2692	-18.208	10.2574		-6.2841	26.2819	-17.6996	26.2055		-23.0707	14.3185	-17.7955	17.7955
-8.8985	28.5179	-19.5563	19.5454		-5.6883	26.7089	-19.5347	29.9585		-23.6378	12.7616	-15.7078	15.7078
-6.2037	25.4195	-25.567	17.777		-7.1001	23.3463	-21.2469	26.8059		-26.0472	11.1998	-12.8496	12.8496
-7.627	27.0101	-27.4617	19.0142		-5.7523	27.9423	-22.0266	18.3093		-29.4231	10.9013	-15.3671	15.3671

## Sheet: GBO
-12.87	29.87	-44.27	18.5		-13.13	29.47	-43.31	16.92		-37.1	1.43	-36.09	8.2
-11.4946	28.3909	-41.7166	19.6883		-12.3338	26.4261	-38.9414	16.3796		-32.3897	2.0748	-31.9854	8.6517
-10.8319	27.2048	-43.7726	16.3047		-11.4132	28.0657	-36.4785	17.7338		-30.3888	3.4427	-35.9791	9.6288
-11.2337	27.8661	-37.0568	10.5313		-9.0269	29.0904	-37.5647	15.6117		-29.0727	6.021	-32.0284	6.7303
-11.506	27.3925	-41.3507	12.376		-11.9914	25.1146	-35.9271	14.2487		-31.4933	6.525	-33.1965	9.7001
-10.0341	23.3758	-36.1743	17.6748		-12.9448	27.8488	-40.1362	15.2957		-28.8424	5.88	-29.7385	6.2687
-12.0759	24.8787	-36.2288	19.407		-11.3222	28.9633	-35.931	16.6931		-34.4434	3.1086	-32.249	10.1253
-12.4479	23.1127	-36.5506	19.5427		-10.5472	28.1884	-43.0145	19.5032		-33.1586	2.4715	-31.036	9.2916
-10.7763	23.6085	-40.2755	17.2903		-12.5792	27.1388	-42.5679	18.8193		-33.4047	1.7569	-33.8275	9.6533
-11.0582	25.9056	-36.1176	14.4131		-10.9509	28.8965	-37.4105	15.1916		-30.4901	3.1554	-31.5736	7.7318
-12.5978	29.9416	-40.7939	14.4256		-12.7822	25.9878	-41.8972	18.3621		-29.146	1.357	-35.8997	7.9176
-11.2294	24.2901	-40.0932	14.6219		-9.8928	25.5804	-40.824	15.7255		-32.2963	1.4864	-32.9976	8.3809
-12.1481	29.7584	-39.7023	15.5226		-11.9605	27.248	-35.8332	15.0588		-35.7894	2.8375	-35.6363	4.6708
-11.7487	23.2917	-44.1072	19.0373		-11.7973	26.9031	-36.0212	17.78		-33.724	6.4787	-33.6142	7.1798
-10.331	25.7458	-42.4514	19.2284		-12.1763	27.6144	-37.8133	17.4894		-30.1064	4.3704	-31.0801	7.1759
-11.6675	28.8414	-42.6401	14.5608		-12.013	26.1313	-38.1423	19.1856		-29.7775	4.4067	-32.2669	6.7293
-12.7486	23.4211	-38.2237	13.8647		-10.5845	28.8276	-37.1933	17.985		-31.6474	6.2379	-29.053	7.3292
-11.9105	28.6239	-41.1805	18.0304		-11.82	28.2524	-38.2367	17.9487		-33.8792	3.7839	-32.9658	10.3566
-11.4336	24.2168	-36.0298	11.1272		-9.4408	27.561	-43.1858	16.7497		-34.662	2.5998	-31.4276	4.526
-12.5223	28.9293	-42.1506	14.4893		-10.4123	29.9258	-36.7433	14.5169		-30.4387	6.5361	-32.3185	4.6276
-11.44	29.4468	-41.0448	18.3958		-12.2735	26.3057	-39.6834	17.8848		-30.0025	2.412	-31.4205	10.1213
-10.868	28.2059	-39.0044	17.649		-12.1543	25.2992	-39.9883	15.6359		-32.5621	3.6715	-33.6969	9.8498
-11.2869	29.2542	-37.6451	10.1286		-11.3964	27.8995	-42.3826	15.7525		-32.7801	4.5678	-30.4383	5.8822
-11.5475	29.4907	-37.241	10.7313		-9.3071	28.4147	-37.528	17.5177		-35.1149	6.0283	-34.7777	8.6636
-10.7078	29.5995	-38.4361	14.8564		-12.3848	27.6755	-39.757	19.2142		-28.6526	2.9199	-34.7928	10.6532
-12.3641	29.9198	-40.6779	14.5298		-10.6827	29.4373	-39.9435	18.8382		-36.0042	4.0141	-30.3223	5.8998
-12.5766	26.3676	-39.7574	16.1172		-12.3791	28.3602	-39.4583	19.3912		-34.9869	5.6958	-29.4215	7.0389
-11.645	27.2936	-41.0734	17.0632		-11.1883	27.4722	-37.6327	18.0621		-33.1485	6.0414	-34.2483	7.1896
-10.8749	23.8718	-39.4989	13.3486		-10.7636	26.7679	-35.6552	18.6143		-28.6394	2.5143	-34.425	5.3049
-10.6911	29.277	-37.7257	11.5087		-10.1978	27.982	-38.0666	13.9377		-32.3723	1.6827	-29.3173	5.298
-11.396	24.4319	-37.4142	16.8967		-12.3818	26.8143	-40.5973	19.5362		-33.8347	2.1337	-33.8096	5.7227
-11.7693	26.1737	-38.1296	18.1789		-10.89	25.0868	-36.4446	19.2375		-32.8106	5.3457	-32.6795	6.6355
-12.8094	25.3266	-36.6235	16.6548		-12.4403	27.8449	-42.3755	18.1833		-33.9408	5.8073	-31.764	4.9211
-11.6406	29.6543	-38.2832	11.1643		-10.0993	28.2447	-35.5481	19.1736		-32.5684	3.9153	-33.6141	5.304
-10.6818	29.4863	-40.8156	10.3335		-9.4953	29.7492	-38.3805	19.4634		-32.1856	1.338	-32.7984	8.4718
-12.6496	28.5849	-36.57	12.4372		-12.9907	28.4704	-35.8704	19.9242		-36.45	6.0551	-34.5396	6.2595
-11.5191	23.4505	-38.4849	16.7829		-10.1727	25.7344	-39.5671	13.22		-36.3665	5.5716	-34.7428	10.2598
-10.2591	23.9995	-36.8325	19.8812		-12.7674	26.7034	-38.7972	18.5865		-35.1161	5.5976	-32.1034	7.2268
-10.4609	27.9086	-37.4634	12.5967		-11.8231	29.4692	-38.0111	19.6885		-29.3275	3.5913	-33.6654	10.7185
-10.9987	28.9622	-39.2538	12.9648		-9.4009	27.8704	-40.8485	15.5355		-32.1911	6.4415	-29.1793	9.1083
-10.1303	28.5356	-39.1055	12.3233		-9.1037	26.6921	-35.7345	14.896		-35.638	6.3669	-31.3339	4.2881
-10.2501	27.2756	-36.7868	14.4993		-11.715	25.2721	-38.7414	16.8947		-31.1491	6.4964	-33.6011	7.262
-11.2106	23.8884	-38.1403	14.9583		-9.0548	26.8599	-37.6665	13.6126		-32.9863	6.6374	-33.2768	10.2341
-11.2528	27.8834	-40.4233	13.7634		-11.9621	28.7218	-36.3965	16.9483		-32.1189	5.772	-32.0976	10.1292
-10.7748	23.9473	-41.8552	18.7666		-12.7433	28.3856	-41.7984	17.0293		-29.1479	2.9377	-30.3106	4.2417
-12.4459	29.2813	-39.5036	19.5221		-9.4081	26.5297	-42.7138	18.3901		-33.8719	2.5341	-33.0331	5.2453
-10.4357	23.3204	-42.1537	15.362		-11.279	29.3468	-39.3544	19.4088		-30.6803	3.8305	-30.6269	9.9505
-10.28	29.8395	-38.6825	13.5504		-10.5317	27.4832	-37.3914	18.9707		-36.0384	6.2366	-32.744	8.8529
-10.2632	24.5489	-38.2595	15.4316		-10.3356	27.6868	-39.493	19.998		-28.0557	6.414	-32.2851	7.8928
-10.0361	29.9097	-38.4987	16.3538		-10.9294	26.9872	-37.1564	19.6922		-33.1554	1.7333	-36.0503	10.0077
-12.5614	29.9316	-43.7161	11.8805		-11.0455	28.0125	-39.4377	14.9089		-35.3898	5.6826	-32.2996	6.1582
-11.0076	27.5373	-41.614	13.3936		-10.088	25.7829	-40.1157	16.3906		-32.7017	5.1398	-32.2922	8.6199
-12.0519	25.9311	-42.6507	15.8735		-11.451	28.5558	-36.8399	16.3679		-36.7759	4.403	-30.6856	6.9295
-10.1941	26.6994	-40.3978	11.9235		-10.6311	27.3473	-35.2227	18.1847		-34.5807	3.9297	-31.8682	10.8986
-12.8405	27.1399	-38.9989	12.8483		-12.4785	25.9541	-42.5339	18.5932		-29.8649	5.4658	-35.7087	4.8165
-12.5179	29.1658	-39.2	18.3156		-12.2652	26.3652	-35.4901	13.5186		-32.8538	6.7135	-29.3609	4.9698
-11.0661	25.4153	-43.9864	14.7174		-10.1169	29.8551	-42.7717	19.0445		-36.0305	3.4155	-30.6773	6.6768
-12.0595	28.9403	-40.1401	10.0492		-10.3793	26.5003	-42.95	15.1714		-33.6738	5.7075	-32.7921	5.1472
-12.1463	27.0499	-40.0999	17.0456		-9.4615	28.2017	-39.9202	17.3155		-32.5526	3.1504	-34.214	4.6407
-10.5605	24.0853	-38.3396	11.4196		-11.3656	28.9536	-42.7489	17.0886		-30.96	6.9072	-35.0008	5.4444
-10.1272	28.1981	-40.0779	16.5939		-10.4043	26.9996	-41.9971	15.611		-35.2471	3.792	-33.6711	10.2749
-10.5931	27.9211	-42.1803	19.0989		-11.5392	29.1823	-35.86	13.3805		-35.5188	3.9092	-32.555	5.2821
-10.4233	23.4582	-43.1371	14.7885		-12.7999	27.5507	-35.8787	17.6653		-33.8337	4.5838	-34.7615	9.1649
-11.271	29.45	-41.7836	13.7368		-12.3236	26.2245	-38.9343	17.3914		-35.3439	5.2752	-32.9515	5.3698
-11.5122	27.872	-36.9073	13.572		-10.9489	28.7141	-43.0619	17.128		-34.6765	1.3515	-34.6912	6.4143
-11.7343	29.5282	-44.0181	14.8011		-12.1404	28.542	-39.1673	13.212		-32.2099	1.8507	-35.2839	5.845
-11.1072	24.7436	-38.865	12.729		-11.39	27.5725	-41.3415	13.1604		-36.3916	3.7544	-30.0901	6.3472
-11.5302	25.5378	-40.5187	16.9277		-9.5638	28.2135	-40.6234	16.5058		-35.179	1.635	-34.6614	7.216
-11.9321	24.4817	-41.7179	14.5888		-9.0887	26.4473	-35.5154	14.8976		-32.8707	4.4733	-35.2425	10.9143
-10.9955	26.5574	-42.0943	18.9275		-10.3532	28.0894	-42.8603	19.0438		-28.9136	4.8586	-35.4714	6.7418
-12.1258	28.4255	-40.4777	12.6725		-12.529	25.8905	-36.4122	14.1407		-36.0385	6.23	-34.0219	7.1684
-11.5788	28.1941	-38.5813	17.394		-10.3764	27.0792	-42.6828	16.828		-29.0295	4.8465	-32.1254	5.4249
-12.1171	26.8916	-41.4381	17.0277		-12.7532	28.0563	-43.2248	14.721		-36.6871	5.352	-32.5397	10.1171
-10.5366	28.1811	-42.4095	18.217		-9.8664	26.9004	-36.9281	13.0118		-36.4471	3.6515	-34.2204	4.9038
-10.0271	28.7186	-42.8762	13.1684		-12.572	25.6934	-38.4766	13.5254		-31.9396	5.6545	-34.3365	7.6974
-11.9735	26.7558	-43.3406	12.0738		-10.3698	29.4652	-40.7236	14.1664		-35.9484	4.1135	-32.0043	10.0096
-10.0233	25.4299	-36.1282	15.4758		-9.4074	26.2255	-36.9759	15.2377		-36.1961	4.5029	-31.7609	7.2585
-11.1188	27.0735	-39.7288	17.3153		-11.0432	25.28	-36.5411	18.1818		-35.9431	3.1675	-34.4518	8.8157
-11.8995	23.3861	-39.1121	12.8705		-9.9048	25.2782	-42.9513	13.215		-33.6575	2.7703	-32.3417	4.8268
-12.0738	23.1082	-43.0297	11.6275		-12.2211	26.6681	-35.0028	18.7115		-33.6213	3.827	-30.5274	9.5099
-11.6374	23.3534	-38.2277	13.5602		-11.1873	25.814	-39.3311	18.7273		-35.2366	4.4427	-32.2435	8.2306
-11.5009	23.5666	-37.3324	12.1184		-11.3986	28.1251	-40.8775	13.4176		-29.3614	6.8508	-32.3135	8.2954
-12.8447	29.7365	-36.3153	12.0735		-11.9098	26.9318	-37.8042	19.7448		-33.2112	2.9089	-35.8772	5.2767
-10.8654	29.2585	-42.8199	16.5991		-9.0997	28.9227	-40.0436	18.9775		-36.0558	5.3509	-31.9627	4.4293
-10.7111	23.0456	-38.6898	16.2705		-9.0688	27.7898	-38.7506	19.5176		-33.0079	6.5362	-30.8438	7.22
-11.9298	27.1268	-38.6808	17.5498		-12.8321	27.4	-37.3305	19.1179		-33.455	5.86	-34.2095	6.9589
-10.5732	29.7465	-37.7756	15.8401		-12.7282	25.2977	-38.322	17.6403		-29.0016	6.5459	-34.8462	10.3816
-11.5758	23.0092	-43.7898	18.1836		-11.5866	26.6745	-37.0731	19.72		-32.2642	1.7867	-34.403	9.0403
-11.4702	25.2676	-42.2855	16.8616		-12.0701	26.6705	-40.8603	13.1181		-32.2845	5.5688	-31.1175	9.9601
-10.1427	24.3286	-36.5337	16.4009		-9.4595	25.395	-39.134	19.3263		-30.0412	1.748	-31.826	10.8746
-11.5813	23.4492	-39.172	19.1321		-12.4933	29.6109	-41.7239	17.4653		-33.5577	4.0851	-30.9253	7.6434
-12.6669	24.8138	-37.771	15.1957		-10.3627	26.1144	-39.0242	16.3264		-36.048	4.7194	-33.7127	5.2048
-11.3386	24.1707	-36.3623	15.0356		-12.0957	26.1021	-38.5741	13.7868		-29.9668	4.5552	-33.1573	7.7713
-11.531	29.0691	-36.2454	14.83		-11.6246	29.3778	-42.0992	16.456		-29.6272	5.5813	-32.6777	9.7118
-10.956	27.066	-40.0771	11.2069		-12.8903	27.6999	-38.1119	14.4156		-36.9603	3.8761	-35.8339	5.9716
-12.8015	27.7726	-37.3757	14.9342		-12.3012	25.3422	-41.6818	19.1027		-31.256	6.5794	-34.0224	5.2017
-10.8994	25.9489	-39.6274	12.2121		-9.7738	26.6912	-36.5797	14.1037		-32.9483	3.106	-33.4999	6.3167
-12.6173	24.3374	-39.2799	16.989		-12.185	25.8411	-41.9132	18.5838		-28.2069	4.4984	-30.655	4.7189
-11.7105	27.0447	-44.0926	17.1123		-11.2216	25.1809	-38.639	17.182		-36.0354	6.63	-30.5716	8.6438
-10.3191	27.2578	-37.9119	18.4638		-9.444	25.335	-37.9322	16.0462		-30.884	4.5429	-36.0275	4.3285
