# Supplementary material for: Optimal wideband digital fractional-order differentiators using gradient based optimizer
Source: PeerJ Comput Sci. 2024 Oct 14;10:e2341. doi: 10.7717/peerj-cs.2341 (PMC11639271; doi:10.7717/peerj-cs.2341)
Supplement: Supplemental Information 3 — The outcomes are written in three sheets, each for a metaheuristic algorithm among (RCGA, PSO, and GBO). Since the design example involves three design cases, the outcomes within each sheet are given in 12 columns, namely (A-B-C-D for case 1, F-G-H-I for case 2, and K-L-M-N for case 3). The first two columns for each case (e.g., A and B) are corresponding to alpha=1/2, and the last two columns (e.g., C and D) are corresponding to alpha=1/4. The first column contains the maximum relative magnitude error (delta_r), and the second column contains the maximum relative phase error (delta_phi). [file peerj-cs-10-2341-s003.xlsx]

## Sheet: RCGA
-10.43	31.05	-14.38	15.01		-11.15	29.92	-28.93	8.38		-20.83	17.94	-32.72	7.5
-9.6483	18.9391	-9.5388	9.2917		-5.2005	25.2537	-20.6008	6.9075		-19.2723	10.9364	-9.1576	8.7564
-5.6402	24.312	-13.2162	16.7852		-6.0005	12.8647	-17.5419	9.3948		-10.6727	18.2295	-14.9158	9.0769
-4.3286	13.1232	-13.9055	9.8434		-4.1236	25.4703	-25.474	7.5792		-12.6201	16.362	-13.2727	8.0811
-5.2099	14.7965	-9.0275	9.74		-8.7234	29.5672	-27.004	10.0373		-11.0563	12.5413	-12.3102	6.0861
-5.4004	24.9644	-9.0048	8.2432		-4.0519	16.0098	-18.5875	10.4329		-7.7705	9.4432	-13.3826	10.8274
-6.4165	12.804	-11.0671	16.2019		-10.8457	24.6932	-18.3349	10.1234		-18.4689	20.3978	-9.623	9.1018
-2.1092	27.7376	-12.6911	9.9046		-7.1449	14.5759	-25.4224	9.7225		-17.0696	13.6483	-9.9026	8.2882
-5.7572	28.2263	-9.2806	9.2713		-9.0419	24.2801	-26.4876	10.5029		-12.7382	10.5237	-12.1058	8.8483
-2.1401	25.4031	-7.2218	9.6779		-8.4761	30.687	-25.2564	6.0704		-18.3657	12.3144	-14.011	10.0724
-8.4752	18.1697	-10.7275	13.6807		-10.5646	19.2306	-16.3783	7.6216		-9.1088	8.7196	-13.3965	10.2498
-4.6731	27.0312	-12.1369	12.0998		-4.5337	29.9025	-22.2883	7.7458		-9.285	10.1978	-7.5014	10.6304
-3.3331	28.9074	-10.4377	15.3511		-5.9232	30.3379	-22.4486	6.806		-17.0725	11.4758	-14.4914	6.9574
-6.7728	17.0167	-11.0902	10.1455		-5.8021	24.0002	-19.8973	7.9132		-11.6259	13.0696	-9.3801	7.5886
-2.6061	25.6337	-11.4862	9.4943		-4.967	20.5549	-17.5444	9.8334		-9.0901	18.8158	-8.8113	8.7861
-5.2119	13.0131	-13.6328	10.0482		-7.9428	17.2087	-20.0063	9.7585		-8.1791	14.2813	-8.3946	10.433
-7.1365	13.1225	-10.7296	11.1316		-10.4241	18.7183	-22.7616	7.657		-20.481	14.2959	-8.9359	8.0111
-4.7755	18.3119	-9.4597	14.1957		-5.9342	25.6231	-28.9122	10.2612		-17.6946	20.7101	-13.6249	8.4797
-3.9447	27.7731	-12.4753	11.3453		-10.3417	16.9393	-28.8587	7.2464		-11.9877	11.5712	-9.392	6.5465
-9.1911	15.6907	-8.2609	9.7722		-4.2041	24.7497	-24.092	7.3323		-11.2952	17.9546	-9.0984	8.1202
-5.6962	30.5571	-12.2125	13.0283		-8.7589	27.2908	-20.3401	9.8659		-16.5575	12.1092	-14.884	9.1699
-5.1604	21.1455	-9.7886	10.4445		-10.9293	21.3586	-26.6309	7.0868		-19.1898	12.4366	-6.1875	6.8715
-7.9651	23.8556	-13.9341	10.6917		-5.014	29.5086	-17.1719	6.3561		-7.2148	5.5137	-8.3717	8.5007
-4.0772	31.9721	-9.2721	15.1294		-4.0732	13.6679	-28.6115	10.7533		-18.8341	11.6069	-6.977	10.447
-8.6262	26.2285	-9.6342	13.9816		-7.2262	23.2981	-18.2758	6.2249		-16.4568	13.7162	-12.0621	6.3552
-4.5282	18.6631	-10.0299	11.4232		-9.8641	26.2393	-16.0328	7.6894		-15.3057	12.7487	-14.9902	7.3134
-10.0479	28.1714	-12.972	9.9703		-10.6731	17.1634	-27.382	6.8449		-18.4864	20.9311	-9.3886	9.2744
-5.5281	14.7228	-7.4386	12.2728		-8.073	17.5847	-26.9266	6.1653		-15.6708	15.716	-7.2804	7.686
-7.617	22.1381	-10.1618	13.7833		-5.1392	13.2371	-22.6846	6.6932		-12.9611	13.7609	-12.0076	7.5643
-10.2032	31.1884	-10.818	8.2598		-4.5117	22.7899	-17.0199	7.3338		-8.7618	6.7901	-12.8946	7.6565
-5.1885	19.0032	-9.7403	13.9388		-7.8112	22.6404	-22.4368	8.1086		-14.4531	11.6825	-13.0872	6.6959
-5.6371	16.6453	-9.5705	10.9885		-10.3123	29.0069	-24.5856	10.6879		-9.2763	10.3743	-9.4511	6.7188
-7.1049	23.249	-13.8858	14.1736		-6.7181	24.1545	-21.5996	9.7149		-20.0746	8.5363	-13.6721	9.5238
-5.8049	25.8484	-9.2578	12.7356		-7.0116	27.4101	-22.5641	10.8896		-11.3404	16.5526	-7.0916	9.7639
-4.8576	15.3112	-9.1814	8.5835		-8.6894	29.0888	-23.3373	10.6863		-19.3842	7.85	-13.9167	9.1668
-8.6615	30.2077	-7.4593	16.8139		-4.419	29.9301	-24.8849	7.5422		-18.256	15.0535	-15.0949	7.8221
-3.6119	14.2752	-13.0359	8.5026		-8.7864	21.6304	-19.6815	6.1385		-10.0829	17.0731	-10.1972	9.4218
-6.4379	27.632	-9.8633	13.7954		-4.4192	19.7749	-19.6415	6.2677		-8.3078	13.9447	-6.2977	6.6847
-8.9265	23.0787	-13.8098	8.4524		-7.0713	23.4992	-23.9912	9.3996		-11.9389	14.9937	-12.9171	6.9123
-7.6971	26.6243	-12.4439	10.6332		-7.7274	29.1492	-16.9783	6.3095		-13.971	6.0642	-11.3108	7.598
-9.6205	27.0413	-7.8758	9.1274		-7.8851	17.4801	-16.8842	7.8382		-12.6367	14.2638	-14.3237	9.3424
-3.9798	12.9688	-10.131	9.5519		-8.2329	22.5957	-24.7664	9.692		-18.9327	7.9608	-6.1756	9.685
-4.1759	24.8574	-8.9112	9.2623		-10.689	16.9423	-15.0574	7.2286		-7.097	16.7849	-11.9264	9.5878
-2.2537	16.6913	-8.634	11.9197		-6.4868	29.9678	-23.2831	8.7579		-18.3419	5.6502	-9.504	8.5457
-5.2652	16.6899	-13.9594	12.1249		-7.5738	14.9452	-19.5159	7.531		-19.2242	16.7376	-10.7357	9.2314
-8.1038	22.701	-7.2428	16.8816		-4.802	23.0711	-20.0048	7.6436		-17.4837	20.291	-14.6249	8.6985
-5.0567	29.7301	-11.636	11.8546		-4.7806	22.8568	-19.5516	6.3653		-19.528	11.7131	-7.0122	8.0879
-9.2516	17.9518	-12.5633	12.6226		-5.7495	14.4464	-25.1854	8.9552		-20.1479	8.966	-13.3134	9.1928
-10.1805	16.9876	-10.169	12.7584		-5.5129	19.0286	-27.8657	10.9649		-11.7216	15.1086	-11.6149	7.6216
-3.4329	21.1109	-8.1372	14.9389		-6.4502	23.5368	-24.9425	8.2055		-15.5072	10.8356	-7.1822	10.9101
-3.6664	31.9303	-10.4122	12.2071		-8.8749	29.051	-24.456	6.159		-15.5436	17.3789	-7.8526	6.4908
-8.8036	23.8931	-10.7089	10.0098		-8.5355	21.614	-23.4395	8.9597		-11.5489	16.7978	-8.0941	7.8994
-5.4621	13.4575	-10.8315	10.1189		-7.2219	25.6796	-24.9862	9.7119		-11.7442	10.1557	-6.5059	6.1028
-8.373	30.8046	-9.4717	9.5053		-9.1983	27.5213	-26.9145	6.8546		-7.9564	13.5391	-8.2388	10.5773
-2.6579	29.9713	-7.9833	14.8387		-6.6778	29.8895	-17.4032	8.8502		-16.586	12.4957	-12.1115	8.96
-4.438	29.1822	-13.4807	11.5877		-7.9033	12.9882	-27.0882	6.17		-14.087	20.5605	-9.2001	6.367
-8.7169	24.34	-8.7869	11.3315		-9.5408	19.8662	-15.7393	10.8515		-12.2231	16.0754	-9.4439	7.3024
-2.3893	27.6842	-10.5739	8.9818		-9.4627	15.1943	-18.1333	8.1571		-8.5062	15.4255	-6.17	9.3421
-8.154	15.9053	-9.5715	11.2581		-10.578	18.5269	-15.1227	8.6013		-20.7975	19.0428	-11.4208	10.0797
-5.1162	25.0822	-9.8101	14.6567		-4.6189	16.3344	-22.3635	9.2827		-17.6374	18.3247	-11.0079	7.5433
-9.8725	19.2437	-13.5229	8.5664		-8.9925	18.8156	-20.0416	10.3655		-20.3476	11.4919	-13.7331	7.2922
-4.718	18.3712	-10.4975	15.4292		-7.3246	17.2008	-18.8332	9.2768		-18.3641	20.4517	-11.0293	8.9728
-7.4746	29.9342	-14.3591	14.9751		-7.3561	21.6874	-18.4502	10.5404		-15.639	13.0966	-8.4942	10.8054
-8.9794	23.705	-10.4493	11.0775		-10.9591	15.5024	-25.4657	6.3863		-15.413	6.0071	-15.0053	6.3688
-5.9048	30.9401	-13.2623	12.4921		-8.4534	13.5527	-27.2361	8.22		-9.3783	16.5408	-7.6356	6.5954
-3.9489	30.0047	-14.2571	8.8669		-6.417	24.1661	-18.6495	7.3771		-13.652	20.9026	-6.0993	9.2869
-2.6648	22.8333	-7.1723	11.1974		-10.9142	12.2044	-15.0032	9.9283		-8.5666	6.133	-8.6337	7.2734
-2.1234	16.1678	-9.8365	14.996		-4.127	15.7004	-20.1593	8.056		-18.6929	14.9753	-9.2023	10.0672
-6.9422	19.3958	-12.7877	8.5989		-5.8256	30.2887	-19.109	8.9988		-15.0952	5.4962	-7.6084	7.3713
-9.466	22.2517	-8.6982	11.3508		-9.2984	20.9502	-24.1373	9.528		-10.322	5.3089	-9.7509	6.7653
-8.1798	27.3443	-10.7116	11.667		-5.8699	18.8672	-24.2327	7.1678		-18.3181	9.0116	-7.3344	9.1374
-4.3649	29.1267	-13.1116	11.8275		-11.127	21.5565	-24.8682	9.1136		-15.5119	8.6658	-14.1214	10.4387
-9.6377	22.0272	-9.4914	13.716		-8.7804	28.8444	-21.8905	8.9427		-19.4	13.72	-11.2055	6.916
-7.6751	25.4628	-10.7019	9.5816		-9.8139	22.5511	-28.0689	8.8732		-11.4896	5.7961	-15.1328	6.3231
-4.5842	26.9411	-12.8083	12.1986		-6.0961	28.4176	-23.4437	10.6019		-11.9352	9.6868	-7.3173	6.4688
-3.5106	27.7397	-8.1414	11.0405		-9.559	25.9744	-27.033	7.4314		-9.3093	9.71	-14.2503	8.7645
-5.0243	15.0045	-12.3509	8.0444		-10.3414	29.9992	-17.1737	9.977		-7.3745	14.6171	-12.6732	10.3393
-2.2024	25.2025	-13.5472	11.9787		-7.1808	23.5768	-26.0278	6.3632		-14.1197	5.8522	-11.1701	10.7358
-7.0034	12.7184	-11.1622	15.1433		-9.4905	20.1277	-19.8956	9.0147		-9.8607	14.3561	-10.5543	6.4081
-2.3444	13.6676	-8.0983	11.1211		-7.5915	20.1905	-27.6584	6.741		-20.7952	16.5905	-14.4589	6.8092
-8.1089	21.6623	-12.6317	13.3709		-8.3162	14.683	-27.8737	9.1382		-15.5739	17.486	-12.9239	10.2764
-8.6854	28.8211	-12.8681	8.8636		-10.229	25.6861	-25.1239	10.8439		-16.8626	8.5286	-12.7043	6.806
-3.8418	31.0711	-7.5679	10.4063		-6.2742	12.7866	-26.2305	8.0666		-8.4847	16.7437	-6.4326	6.4745
-10.3971	19.5003	-9.6299	8.5775		-6.9365	16.3214	-19.2935	8.0985		-14.0823	12.3807	-15.0625	6.4845
-5.4824	26.8473	-10.9998	11.0119		-10.4335	22.1255	-22.3825	10.6333		-18.6124	7.1612	-12.0821	8.4086
-5.8938	25.85	-9.9103	11.4488		-5.4235	25.9496	-21.5395	6.6016		-7.7198	8.1922	-7.9718	7.1237
-3.3206	17.8221	-10.3699	9.0962		-6.5113	19.8371	-28.566	6.2593		-17.5415	8.0976	-8.8257	10.8371
-4.0193	16.7487	-11.2367	11.8805		-6.2681	22.2642	-20.935	6.6404		-9.3146	12.9009	-8.6196	7.9453
-8.6981	18.1008	-13.9749	10.4824		-6.9973	26.7224	-22.1169	9.1126		-20.2381	16.4904	-13.5745	6.1797
-3.6463	20.726	-9.1312	12.8916		-9.8135	12.6207	-27.879	10.1918		-17.5881	10.1906	-7.6289	10.7391
-7.3262	20.9094	-9.5978	12.5874		-4.8204	22.4393	-22.968	6.5974		-9.1071	6.3344	-8.6308	9.7879
-7.8873	22.0404	-11.9218	12.9383		-6.4517	14.3128	-16.2888	9.0004		-8.5201	16.271	-10.1796	8.4116
-8.5619	24.5036	-7.0725	14.9226		-9.8411	30.9368	-18.7107	10.903		-8.8416	18.9211	-10.6514	9.2838
-2.9647	15.9078	-8.5555	11.8079		-10.4533	20.6169	-27.55	9.8535		-17.5066	19.1864	-8.5403	9.9821
-5.9401	30.2946	-14.2419	11.8702		-9.2941	23.7112	-19.2573	9.0282		-17.2674	7.0554	-6.343	8.2615
-2.2494	26.5739	-9.5695	8.5012		-5.8384	14.8719	-19.2594	10.6136		-8.07	20.253	-10.7008	9.8289
-4.6657	19.7486	-9.8807	12.3487		-9.9147	30.6718	-24.2503	7.018		-14.3493	19.3706	-8.2181	6.3991
-3.8208	23.5147	-9.1432	14.4127		-6.3395	14.9196	-27.288	10.6203		-7.8725	8.5353	-9.2447	10.634
-4.0875	27.2996	-10.3128	8.0672		-7.16	13.44	-24.2053	10.3289		-7.1618	5.9159	-9.2633	10.1519
-7.4502	12.4005	-8.4965	14.8209		-7.4203	29.4098	-19.7928	8.7432		-10.5126	6.5731	-7.2845	7.9687

## Sheet: PSO
-24.87	16.57	-25.86	11.81		-24.32	20.22	-37.93	8.26		-24.68	6.55	-30.51	9
-19.2076	9.278	-20.55	9.136		-23.6316	30.9565	-31.442	9.0666		-21.0697	15.2836	-14.8162	10.4746
-24.3479	16.1255	-18.9442	8.5793		-17.1948	14.4818	-28.3475	7.8961		-17.212	5.3578	-19.4822	8.4403
-22.4461	15.7851	-23.6311	10.1132		-17.4494	13.1647	-35.2218	7.6197		-18.0266	19.1632	-12.9826	8.5212
-20.1632	9.6409	-14.9035	15.4712		-17.953	18.4866	-27.2583	10.8731		-12.0734	8.4404	-15.5231	9.7807
-23.2107	21.443	-17.1326	13.6253		-18.9377	17.7984	-32.3467	8.5007		-21.5258	8.7579	-15.8007	10.436
-23.1826	14.948	-23.7729	16.1678		-20.8423	14.1328	-31.6011	6.6244		-16.1592	16.8612	-17.9153	6.6948
-20.9645	9.213	-20.43	11.2728		-17.1804	27.2161	-34.9418	7.9227		-16.5563	17.4789	-17.9384	9.2693
-18.4475	9.8115	-14.9182	9.6656		-21.3613	18.2785	-25.0916	7.387		-21.9288	17.8269	-16.9137	8.2323
-19.0947	17.6609	-20.6486	9.8531		-17.7431	15.5336	-26.3189	8.2191		-16.3388	16.9293	-14.165	10.243
-17.123	22.6194	-25.6204	16.7473		-17.5599	20.5322	-31.3403	9.8549		-22.4266	9.7604	-13.902	7.0866
-24.1056	10.1901	-24.1892	10.6634		-19.5155	14.9966	-32.2075	8.6357		-12.4823	14.5144	-15.7536	7.9832
-17.1248	8.7045	-14.5072	12.3644		-22.9099	13.5541	-32.0067	8.5897		-18.0001	15.4598	-14.0066	9.6345
-19.2192	17.6503	-25.8135	14.0305		-20.3246	24.6874	-29.869	8.9458		-11.0631	19.1103	-15.7868	8.8313
-18.2437	18.7499	-16.2251	13.1008		-23.0548	24.3217	-32.3447	10.2738		-13.3443	5.6147	-14.4584	8.0567
-24.1969	15.7353	-16.54	13.1025		-19.9764	22.5625	-34.9749	10.1621		-21.4987	13.7651	-18.4037	7.3756
-21.5647	13.5892	-20.0859	12.2582		-18.0026	18.2222	-25.8187	8.7428		-18.2102	9.5467	-15.5308	9.2138
-21.2959	8.4973	-24.358	8.9117		-19.3165	22.2676	-34.3393	8.1696		-13.2904	12.9697	-19.3128	8.1543
-18.7595	15.1706	-15.4115	11.8751		-19.2017	23.952	-26.0644	7.5545		-22.7491	20.0673	-17.1316	8.9345
-23.5724	10.3419	-22.3908	10.2987		-22.9202	25.698	-37.7401	6.0897		-14.7964	8.0594	-16.0637	8.167
-24.2649	11.7179	-15.0442	8.3895		-18.0249	29.7227	-28.4368	8.9283		-18.0485	11.9126	-20.6438	6.2879
-18.1465	8.0275	-17.0051	9.3886		-17.2174	14.7386	-34.5879	8.3401		-15.2301	16.0885	-16.9777	6.8489
-19.9715	12.7575	-15.2592	10.9719		-17.3276	29.034	-35.4598	6.6021		-12.7108	20.4161	-14.0617	7.534
-17.5381	14.8426	-19.1348	14.5336		-17.4147	20.3959	-36.9243	6.1366		-24.4875	6.4092	-12.0659	6.1257
-23.6699	12.9463	-17.6172	9.0704		-20.627	19.1113	-26.2754	10.5238		-16.8136	6.5301	-19.7011	9.1461
-21.1631	21.278	-14.3717	13.1376		-19.8196	12.4077	-27.1396	8.2789		-23.8198	5.4587	-13.9547	6.2306
-23.247	15.6418	-19.9021	10.0828		-21.7366	20.2694	-30.1874	9.0425		-21.1776	11.2364	-17.5353	10.0216
-23.0957	10.286	-23.7409	14.4863		-20.5713	15.7052	-32.5828	9.5821		-12.704	15.6355	-16.0556	9.2065
-23.0111	16.6405	-25.0446	16.7048		-24.0014	24.4618	-30.9832	7.7745		-11.7406	7.3736	-17.3268	6.3491
-21.4116	10.7269	-19.8972	14.8957		-18.2502	18.3541	-29.6785	6.6728		-12.8194	6.1316	-20.4136	7.1259
-22.1546	21.7249	-22.9099	15.0725		-17.9651	26.6435	-29.0918	7.9749		-12.4643	8.674	-16.2575	6.4267
-23.8075	19.8199	-22.9385	10.4129		-19.3891	18.5553	-28.1193	10.4107		-14.1708	16.8281	-20.3541	6.7129
-17.912	12.7205	-25.0939	10.8462		-18.4496	19.3858	-30.6355	8.1301		-11.0341	6.8618	-14.1338	9.6121
-20.293	12.7182	-21.3437	13.2491		-22.0624	23.0434	-30.8026	9.2279		-14.1581	14.2856	-14.412	6.0434
-19.0832	22.422	-21.6763	10.0426		-20.2095	20.4208	-33.708	8.9376		-21.4567	11.5818	-15.8588	7.2948
-21.717	17.4773	-24.5467	9.0986		-21.0011	27.0874	-31.6255	7.2666		-24.4512	20.793	-15.4138	9.223
-21.0176	21.5581	-25.3016	13.4038		-18.4901	28.1118	-36.5865	9.3409		-21.1182	14.9718	-17.6108	8.9437
-21.1841	13.0435	-17.2282	9.2552		-17.2187	16.7086	-37.2434	10.8833		-12.8299	18.1168	-13.1759	9.443
-22.1685	13.3343	-21.3491	16.958		-23.0213	28.3405	-30.2162	7.6068		-23.4296	14.5446	-16.2462	9.7648
-24.8225	19.4342	-21.0034	15.4553		-18.6964	16.8396	-28.338	7.3338		-11.7279	12.8139	-14.3243	10.1642
-24.7452	8.9161	-17.7453	8.4269		-20.7647	27.4242	-34.0045	6.6564		-15.0909	18.1365	-13.5029	9.9862
-23.2781	15.1698	-23.4958	12.2315		-18.0305	16.7625	-34.3312	6.0238		-16.1785	15.4365	-14.0626	9.5821
-20.553	11.7501	-14.9353	12.7184		-22.7994	25.4376	-35.8198	10.0635		-19.7541	10.9117	-14.9	6.7006
-18.1414	22.5352	-16.9256	14.0099		-22.631	18.3029	-26.3021	9.1734		-22.1556	13.1103	-19.4467	9.4013
-18.1123	22.6185	-23.4925	14.5735		-21.5095	13.4983	-34.9461	6.6166		-20.4109	9.6173	-13.744	6.7333
-19.1597	9.7248	-25.2161	16.0768		-21.2049	30.0856	-36.0049	7.8315		-19.2225	8.2662	-16.9629	6.1192
-20.1211	18.4603	-24.1272	11.9628		-23.4665	17.8257	-33.0953	7.032		-16.467	11.5297	-13.5976	7.4587
-22.7387	19.721	-20.1669	10.7477		-22.1662	30.4378	-26.3565	8.5423		-24.5669	10.8391	-14.6861	7.6619
-23.8699	14.7549	-14.5293	8.6074		-20.1966	20.3302	-28.489	6.9178		-23.1543	9.2167	-17.1966	9.526
-23.3537	16.6161	-21.7207	10.9642		-17.3197	24.8334	-33.9115	9.7639		-16.6986	16.4872	-18.2083	9.8343
-17.9707	12.0549	-22.4706	9.7956		-19.4139	26.8915	-37.6119	10.2942		-16.497	9.6752	-12.9464	10.5119
-20.5332	17.9263	-16.2841	10.8875		-20.1646	17.7637	-27.9455	9.1101		-24.2339	13.508	-16.2801	10.2305
-22.4211	9.7952	-18.073	16.0127		-23.6422	23.224	-31.4058	6.7909		-22.8057	7.5735	-14.3371	9.8405
-23.1783	14.9603	-21.2343	14.5237		-22.0808	13.3169	-25.5363	8.9585		-11.1733	6.5643	-19.3233	10.5412
-20.62	17.0374	-22.9693	9.4906		-21.4056	13.648	-29.5476	7.2727		-17.9234	13.6358	-19.4521	8.6561
-23.2849	13.724	-14.9371	8.2056		-17.6727	15.7466	-33.0876	6.6939		-20.0656	9.5386	-12.4221	10.4921
-20.8505	21.9538	-16.6802	10.3924		-22.7728	28.2424	-27.7574	10.9148		-21.3878	6.7968	-18.6286	8.2356
-19.8654	13.4286	-24.3299	13.3519		-21.5737	19.9313	-30.8638	6.0878		-12.4166	11.4549	-15.9796	10.1259
-18.8343	15.9179	-24.6799	9.8708		-18.5426	24.5536	-32.1049	6.9973		-11.6767	18.0081	-20.01	9.6973
-23.1861	15.8069	-14.6977	14.928		-22.5681	18.2452	-25.9222	8.9202		-11.0823	6.3008	-18.4334	7.9984
-23.9189	14.0898	-23.8006	10.8828		-23.4288	13.3764	-36.112	7.3212		-14.9073	20.9216	-19.1771	7.4047
-20.5073	20.0722	-24.6555	10.4113		-18.5003	21.4935	-37.3367	7.3864		-16.8807	18.4455	-18.7771	10.0561
-24.5641	13.6152	-24.3804	11.8842		-21.0724	18.5854	-29.667	7.6914		-23.0282	9.0398	-12.0368	10.1817
-19.1195	19.6397	-20.9974	14.4097		-19.6715	14.9342	-32.9584	8.1515		-23.0494	8.7094	-12.7277	9.9273
-18.7536	11.4712	-14.8718	12.1556		-19.8666	13.4431	-33.1728	6.6719		-19.4713	16.3628	-17.2593	6.182
-23.1924	16.7448	-23.8841	8.0675		-17.9925	30.5652	-29.8047	6.7155		-22.4075	12.5097	-20.0717	10.8676
-21.0151	19.9102	-18.443	11.9275		-21.3938	12.2685	-34.7268	6.2437		-22.2445	8.6353	-14.5224	8.5453
-19.7848	17.2888	-16.377	14.0791		-18.5058	17.2131	-33.0296	10.3128		-16.2429	7.0345	-14.6445	10.0788
-18.3892	19.8991	-22.8535	16.2204		-20.424	16.7304	-26.5023	6.0875		-12.5048	10.2459	-15.4179	10.7737
-20.9736	10.7018	-18.0376	15.9532		-21.1002	19.4133	-37.6438	8.7603		-22.835	12.0591	-20.1583	8.2555
-23.2345	19.7268	-23.4102	8.9769		-23.669	25.7921	-33.4667	9.7313		-11.2241	7.3916	-12.5463	8.1121
-17.5532	18.1567	-22.2677	13.7982		-19.8244	15.9231	-29.4279	10.2675		-21.5546	10.3826	-17.3829	8.2985
-21.2912	8.4714	-24.9354	9.3601		-20.9682	20.3872	-36.8429	7.1974		-17.5791	10.525	-18.1808	10.3583
-20.1801	22.7535	-23.2098	13.0796		-21.3938	27.6858	-27.4654	10.2603		-21.0937	17.6275	-19.3395	7.798
-17.5293	21.1403	-22.3998	12.8946		-17.4124	21.4111	-37.7599	9.0525		-24.0272	11.3606	-13.4342	8.4191
-18.1868	16.1372	-16.6695	9.818		-19.5277	22.5586	-31.8659	8.7716		-14.782	15.8116	-20.4226	6.0321
-21.4451	16.9748	-22.0701	9.1102		-18.1541	29.7147	-32.37	6.3129		-19.1355	7.0546	-14.9536	10.868
-21.6428	19.7262	-15.2733	16.0573		-19.0473	30.9325	-37.4151	9.0882		-23.211	7.9237	-20.3639	9.8727
-17.8126	18.9272	-14.075	11.179		-20.2815	13.8033	-30.6589	8.7512		-13.6496	14.8485	-13.2739	9.3271
-21.3551	17.9007	-15.4696	12.4124		-19.8616	17.9169	-33.7484	9.2971		-13.642	11.2609	-15.2207	7.6116
-21.3623	14.3562	-18.5133	10.1252		-17.843	13.8685	-34.0599	7.7113		-23.4879	20.8327	-15.4632	9.5749
-23.1135	22.2953	-20.077	14.1632		-20.9284	17.8613	-36.3267	10.0095		-14.8458	8.0866	-14.4671	10.9443
-21.9901	21.6269	-22.9131	13.1323		-21.3495	21.6288	-28.4568	6.13		-19.061	13.3774	-17.0195	8.5496
-19.0912	21.634	-19.3232	9.4566		-21.6534	26.3859	-31.5603	6.7247		-18.6366	9.1179	-18.1494	7.6006
-18.9739	9.3626	-15.9779	14.2313		-17.8397	14.746	-32.7916	8.7575		-20.0372	5.5986	-16.5209	7.4773
-24.849	15.51	-14.5859	15.6142		-22.6192	30.5354	-33.5112	10.8015		-22.6298	11.557	-13.7999	7.6133
-21.442	11.4514	-23.6158	10.8434		-19.1788	15.7232	-34.2965	9.0031		-20.5312	20.8989	-20.4302	8.4098
-24.1084	22.9731	-23.7761	14.9151		-18.4388	19.5726	-31.2124	9.9275		-18.4497	15.4747	-20.1636	7.149
-20.9433	22.0326	-20.3723	10.9259		-23.7709	27.1069	-35.4851	10.5114		-17.1182	18.9165	-15.2453	6.894
-21.0302	16.5088	-25.404	8.6583		-19.6442	16.6995	-27.3366	6.2835		-13.0946	17.038	-13.598	9.9252
-21.404	19.9581	-21.6395	13.2528		-17.5274	23.6597	-35.3855	7.6806		-20.8647	6.5652	-19.3621	9.935
-19.4655	9.6882	-19.3827	13.044		-19.3815	14.6531	-26.548	9.4573		-16.1644	10.4443	-18.8469	9.4206
-23.5238	8.2061	-21.3177	11.0255		-19.6626	18.1172	-26.6168	10.7285		-16.1189	9.3996	-20.3554	7.7748
-22.7452	11.8351	-16.115	8.3284		-18.1976	14.9266	-33.6565	10.7939		-14.3467	17.1798	-12.6334	8.3381
-24.1148	14.7422	-16.2148	10.9211		-17.1879	27.6057	-35.9112	8.3975		-20.1359	13.933	-19.4276	10.9852
-23.0506	19.932	-16.0347	12.5025		-20.536	29.1422	-31.1732	8.5237		-15.9226	10.9534	-18.4881	9.6547
-23.6712	11.1787	-19.6473	11.7407		-17.3959	18.6423	-29.7835	9.2379		-17.8645	15.5817	-17.7955	10.3796
-18.8802	10.946	-15.4153	15.081		-23.5788	29.9391	-36.5918	10.1107		-20.1445	11.2378	-15.7078	6.0677
-18.9651	18.5624	-15.0929	14.6324		-22.4842	27.3267	-37.1267	9.6457		-19.9151	10.3889	-12.8496	6.8849
-18.2873	22.4833	-15.3198	13.7929		-24.316	21.859	-34.164	8.9199		-19.8137	10.396	-15.3671	10.8568

## Sheet: GBO
-28.46	3.39	-41.66	7.76		-28.46	3.39	-41.66	7.76		-28.46	3.39	-41.79	7.76
-27.0215	10.8912	-39.4137	14.55		-28.1605	12.7167	-35.4519	6.2017		-28.3205	3.7378	-31.9854	9.4913
-28.2881	7.2597	-36.402	10.9808		-27.0493	4.3002	-38.9636	8.3884		-25.3885	6.8007	-35.9791	6.5127
-26.3058	12.7614	-34.2527	8.2733		-27.1326	6.7142	-39.659	7.1442		-26.1798	12.5817	-32.0284	8.9237
-26.0963	10.8208	-37.5946	11.1466		-24.5309	6.5907	-35.8993	9.0287		-26.4171	9.2559	-33.1965	7.6666
-26.7657	3.2559	-38.423	13.7986		-24.5228	9.4015	-36.8472	8.6152		-27.3835	9.8277	-29.7385	9.1487
-27.0297	8.1128	-37.9522	10.2394		-24.441	9.9983	-39.7543	6.6967		-26.0381	7.2199	-32.249	9.9199
-27.5329	7.5787	-37.3058	12.7513		-23.0051	3.3854	-37.328	10.5391		-24.4524	6.5044	-31.036	7.4626
-23.0826	12.8821	-37.6395	9.0337		-27.1152	9.6612	-38.8323	8.0172		-24.8763	11.6669	-33.8275	9.8177
-27.3966	3.8239	-39.3117	12.0269		-23.6391	5.2894	-38.3413	9.1024		-26.3541	6.2369	-31.5736	10.0282
-27.8725	11.2499	-41.2645	11.0991		-27.7757	5.2117	-39.2312	8.4208		-25.2739	8.5218	-35.8997	8.4773
-23.0198	7.109	-34.4725	12.9372		-23.1386	8.3066	-39.9303	7.9196		-27.2596	10.3972	-32.9976	10.4077
-24.9985	5.4882	-36.9321	12.2262		-26.0576	8.7969	-37.1245	8.4167		-26.863	12.0093	-35.6363	8.3229
-25.8304	9.205	-39.5498	12.9396		-24.6074	6.9466	-34.5783	7.183		-25.4492	5.9537	-33.6142	8.453
-24.376	3.6741	-35.1905	10.4646		-25.7732	10.6242	-37.5853	7.0417		-25.7983	7.6063	-31.0801	8.3601
-26.8494	6.9922	-41.5469	12.4863		-27.4038	5.1349	-37.1385	7.3146		-27.5239	13.1109	-32.2669	7.5435
-23.3328	11.889	-40.7804	10.793		-24.4603	9.3472	-34.8227	8.6388		-26.1115	11.5758	-29.053	7.7259
-23.6195	5.4538	-36.4501	11.0946		-23.9118	4.3878	-37.9423	10.7658		-26.9168	11.2969	-32.9658	7.4275
-27.2065	5.0908	-35.4739	9.1935		-26.2985	11.6935	-37.7711	7.3173		-24.7926	12.2542	-31.4276	7.6635
-25.9526	3.6765	-36.7575	10.5853		-28.0844	8.7691	-41.4804	9.3017		-23.0747	13.0195	-32.3185	6.6245
-27.9451	8.71	-38.0595	12.1928		-23.7479	5.4653	-35.7032	9.4288		-25.1381	4.1636	-31.4205	7.1316
-26.5804	9.8278	-36.7363	12.7165		-23.669	8.4894	-38.6416	6.3286		-25.0181	6.4458	-33.6969	10.7883
-23.7949	11.4702	-35.3735	13.8517		-27.7876	7.8915	-37.102	8.9778		-25.8672	4.8909	-30.4383	8.6309
-26.5115	12.8042	-36.9412	10.3137		-27.8186	11.4391	-35.2107	10.5948		-27.3051	4.0585	-34.7777	7.9373
-23.3217	6.3722	-41.0876	10.5254		-28.2031	3.6761	-39.1673	9.0959		-27.6416	12.132	-34.7928	6.9873
-24.6259	4.338	-40.3567	7.5652		-23.0454	3.922	-39.4022	9.5016		-28.3219	11.3111	-30.3223	6.2315
-24.7001	5.4951	-39.3797	12.1284		-26.0721	8.3853	-38.39	7.9909		-24.3799	7.5635	-29.4215	8.7565
-25.1173	5.4839	-37.9793	13.3009		-24.254	9.8882	-40.3815	9.1387		-24.7036	5.0071	-34.2483	7.0782
-27.6749	10.131	-40.6848	8.9001		-24.7172	10.6376	-40.2784	8.3153		-23.3588	4.5578	-34.425	7.7568
-28.0777	6.5445	-38.6423	7.3755		-27.9107	12.4987	-35.8364	10.8337		-24.5942	4.8168	-29.3173	8.4343
-23.3474	12.9437	-39.7771	10.3041		-23.8008	8.6978	-38.0232	7.4771		-24.4635	5.7471	-33.8096	9.5507
-24.1176	3.6406	-36.1619	13.1984		-24.4408	11.8206	-38.1115	7.7359		-25.3135	8.3073	-32.6795	10.1565
-26.2467	4.5933	-39.1698	9.0312		-26.4069	5.0278	-41.3953	8.4189		-24.4044	5.3633	-31.764	6.1134
-23.8852	10.4303	-39.2829	10.855		-27.4705	4.4456	-39.6939	7.5702		-26.0061	11.5341	-33.6141	8.6457
-26.1896	11.4523	-36.1072	11.2315		-24.4374	9.8043	-37.6093	6.681		-26.272	6.5792	-32.7984	9.0904
-25.5799	12.6613	-37.5205	11.0482		-23.77	6.0918	-40.9816	6.4275		-27.573	9.7335	-34.5396	8.0279
-25.8339	4.8422	-40.8304	12.6182		-23.6518	7.4979	-40.7567	6.6859		-28.0151	8.1697	-34.7428	10.6753
-28.4325	7.2475	-37.8387	7.6285		-26.7266	9.6205	-34.9558	10.395		-25.4079	4.3257	-32.1034	7.0821
-25.0309	9.2571	-41.3301	9.198		-23.2828	5.1219	-40.031	10.9988		-27.6965	4.3802	-33.6654	9.6179
-23.036	7.5148	-36.1416	10.4334		-25.3394	4.5661	-34.5533	10.7617		-25.2681	12.8578	-29.1793	9.5948
-28.3959	7.9732	-38.1669	9.504		-25.0296	10.9917	-38.4671	6.1799		-28.0364	11.9816	-31.3339	7.4101
-26.315	3.4239	-38.1848	7.0591		-25.6769	6.1509	-41.0805	6.1632		-27.0863	10.0389	-33.6011	8.168
-28.0137	4.0651	-39.5417	8.7369		-23.7839	7.8665	-41.28	6.2071		-26.294	4.0521	-33.2768	8.5745
-25.9479	12.2146	-39.3391	10.0025		-24.5303	8.1274	-39.5307	10.9711		-27.1791	10.4093	-32.0976	10.9697
-25.024	5.4223	-37.0698	7.7662		-24.7743	8.5526	-35.6618	9.4805		-28.2242	4.2896	-30.3106	7.3047
-23.1833	9.9871	-35.462	7.2841		-23.3056	8.7231	-39.4854	6.3254		-25.415	4.2174	-33.0331	10.4324
-25.2004	12.804	-34.1169	13.7304		-27.0039	8.4396	-39.6731	6.2252		-24.887	8.2538	-30.6269	9.1353
-23.56	10.6193	-37.191	7.9226		-25.2491	6.7547	-37.6937	6.6888		-27.1655	7.2963	-32.744	9.3282
-23.2469	12.4031	-38.9949	7.549		-28.4127	8.0237	-36.0506	6.9824		-23.4675	3.3784	-32.2851	9.0482
-27.0448	11.1961	-39.4086	11.7816		-23.6337	8.504	-41.2906	6.8411		-26.9568	9.0518	-36.0503	10.964
-23.0503	10.4375	-36.4642	9.8473		-23.9044	7.9475	-38.4276	10.6583		-25.2596	12.2787	-32.2996	7.5774
-27.5288	5.7314	-35.8469	10.4623		-25.4804	11.431	-35.5938	6.9833		-27.9011	13.5422	-32.2922	6.8359
-27.5091	10.1984	-36.1982	11.8124		-25.7594	6.6949	-40.5612	6.6521		-24.6635	5.2829	-30.6856	10.0766
-23.5917	9.3483	-39.1281	10.1848		-28.1742	4.0726	-34.228	9.1625		-25.746	11.9091	-31.8682	8.695
-23.2156	9.1139	-39.1953	11.2976		-27.3489	9.0558	-38.6371	9.9067		-27.0115	4.4782	-35.7087	7.7226
-25.1922	7.8901	-39.4901	9.9607		-23.9281	7.1544	-38.8132	7.6607		-27.0399	10.8305	-29.3609	9.192
-23.7581	9.686	-39.3007	8.6462		-26.3697	6.8269	-38.3841	6.5438		-25.6271	12.5842	-30.6773	7.4036
-24.5879	10.0424	-35.7361	10.6034		-26.6803	3.3668	-39.3708	9.0854		-27.0092	4.1766	-32.7921	9.2845
-28.3473	8.7194	-39.9014	7.8939		-24.1632	6.7252	-38.371	7.9337		-25.2157	8.7958	-34.214	6.1109
-27.7397	11.6399	-41.4812	11.8915		-25.0902	4.2322	-40.7789	7.8369		-26.2554	4.5019	-35.0008	6.2263
-27.9468	6.2707	-41.1821	13.4398		-26.8378	6.9278	-35.0818	9.8141		-26.9336	9.0523	-33.6711	8.5793
-23.5271	5.9401	-40.4999	11.1213		-25.4419	8.8629	-35.9466	8.526		-26.6671	12.0064	-32.555	7.4674
-24.3599	6.2254	-37.6566	13.7606		-28.1632	12.0704	-38.7183	6.1187		-23.7667	10.8831	-34.7615	9.4914
-27.5644	3.8512	-38.6241	9.8353		-24.006	10.5873	-40.9999	6.8534		-27.4708	6.3858	-32.9515	6.5672
-23.5366	5.2042	-38.8135	11.398		-25.25	10.816	-34.909	8.0241		-28.1436	9.1236	-34.6912	9.5699
-27.6396	6.9396	-38.8589	9.7573		-25.5074	5.3745	-34.5323	9.1985		-27.7369	7.3067	-35.2839	10.0314
-23.5365	8.8005	-38.6174	11.6731		-26.8463	11.843	-37.0469	6.1822		-25.9706	5.661	-30.0901	6.7284
-24.3158	5.9949	-34.2533	7.7074		-26.2842	4.0873	-40.3206	8.6864		-28.2976	13.7835	-34.6614	6.4423
-23.6109	8.2176	-36.5195	8.6527		-23.2452	7.1375	-40.075	8.4178		-26.3379	5.8508	-35.2425	8.0282
-24.2784	4.1943	-40.1143	12.2332		-25.8215	7.0873	-39.5667	6.9366		-26.8616	6.6941	-35.4714	10.9546
-26.4355	3.621	-39.2032	10.3679		-27.0939	8.1644	-39.7326	6.0466		-25.8083	3.1403	-34.0219	9.5359
-26.6529	3.9245	-37.423	13.7332		-28.0925	11.8559	-38.8727	8.6246		-24.2889	10.976	-32.1254	7.0722
-27.662	4.044	-40.9988	8.5817		-27.4774	9.8504	-40.6321	9.1907		-28.1959	9.4007	-32.5397	9.1525
-23.9742	5.6211	-37.2968	9.1076		-24.06	5.2565	-34.3541	9.8208		-26.1976	9.5815	-34.2204	7.123
-23.2741	8.674	-37.6578	8.0038		-24.0354	10.2677	-40.3471	10.8299		-26.4765	5.2612	-34.3365	7.9684
-26.3726	11.6522	-40.7391	10.641		-24.186	9.0749	-34.9515	10.6967		-26.5914	6.8731	-32.0043	6.2631
-23.7928	3.3423	-39.4938	7.9657		-28.3748	3.0957	-40.3992	10.17		-23.816	9.4882	-31.7609	10.8157
-24.8728	5.2871	-34.9609	10.9345		-23.2891	12.8099	-34.735	6.588		-25.4071	13.3876	-34.4518	7.469
-25.9028	5.0533	-37.0711	9.0247		-24.6492	7.3162	-35.8259	10.2699		-27.6858	13.724	-32.3417	6.4235
-23.5701	6.6031	-39.6847	12.4638		-25.0017	10.2097	-41.1644	6.0598		-25.5568	4.3444	-30.5274	10.6412
-27.2274	8.2866	-37.9005	11.2126		-26.6755	6.6218	-39.3097	6.5428		-24.8637	4.9625	-32.2435	10.1755
-25.171	3.472	-41.1866	8.5241		-27.3202	9.812	-37.4519	8.1487		-23.3333	9.2183	-32.3135	10.0473
-25.8679	10.9142	-36.9061	8.5914		-24.1489	8.8495	-39.1063	10.7693		-27.2992	3.2771	-35.8772	7.75
-24.8051	10.5059	-40.8341	10.5403		-26.374	10.7266	-36.657	7.9563		-26.9486	4.1492	-31.9627	7.0189
-25.6137	8.6279	-39.3699	8.7423		-26.2068	5.3205	-39.2754	7.2701		-27.0073	3.7835	-30.8438	7.6718
-23.9762	9.8423	-37.852	11.0024		-25.7381	5.5124	-40.6089	10.0234		-27.2102	3.1514	-34.2095	10.9769
-26.396	10.4144	-41.0884	7.4696		-26.8147	7.0097	-37.6577	9.1164		-27.2082	5.1183	-34.8462	9.3139
-25.544	3.1115	-41.2626	9.3134		-27.2395	6.3183	-35.1451	10.5034		-24.374	4.7721	-34.403	9.2547
-23.0291	12.9719	-37.8919	7.3173		-24.2057	5.8238	-34.253	7.4838		-26.1713	3.6842	-31.1175	9.1373
-23.5814	12.3577	-35.0535	10.0544		-24.991	10.7168	-34.8766	8.3711		-25.1257	8.8959	-31.826	7.7759
-23.2878	9.537	-39.5248	11.7113		-28.2313	8.1896	-37.7492	7.1489		-26.539	7.3588	-30.9253	6.9509
-23.7068	4.6173	-34.4977	7.977		-27.3256	8.1275	-36.6345	8.8091		-24.5484	6.8566	-33.7127	6.9576
-26.6053	10.6128	-40.4965	10.8042		-28.3273	6.2194	-35.443	6.2583		-23.3696	8.0302	-33.1573	6.5405
-27.9262	8.9922	-37.0624	11.4423		-25.0658	7.9416	-39.1077	9.0094		-27.6789	13.8121	-32.6777	8.1111
-28.1653	11.538	-35.2926	7.0178		-25.0951	11.9353	-38.341	8.8698		-28.2687	11.1814	-35.8339	10.2628
-26.5043	4.3214	-37.956	10.3123		-26.0934	8.3085	-36.9078	8.7255		-24.8965	7.1102	-34.0224	6.2749
-26.8037	9.4445	-40.7316	12.7959		-24.6859	12.3562	-38.7596	8.713		-26.8901	12.6897	-33.4999	7.2207
-23.7497	7.3762	-36.564	7.28		-27.6717	5.8748	-41.6011	6.7129		-26.7931	5.737	-30.655	9.2199
-28.414	11.5024	-35.4814	11.4009		-25.9513	9.2332	-34.4901	10.5834		-27.3161	13.7617	-30.5716	8.4174
-27.0805	6.8528	-35.7448	10.8011		-23.9073	8.1155	-37.7318	8.3253		-24.6754	10.1558	-36.0275	7.9186
