# Supplementary material for: Optimal wideband digital fractional-order differentiators using gradient based optimizer
Source: PeerJ Comput Sci. 2024 Oct 14;10:e2341. doi: 10.7717/peerj-cs.2341 (PMC11639271; doi:10.7717/peerj-cs.2341)
Supplement: Supplemental Information 4 — The outcomes are written in three sheets, each for a metaheuristic algorithm among (RCGA, PSO, and GBO). Since the design example involves three design cases, the outcomes within each sheet are given in 12 columns, namely (A-B-C-D for case 1, F-G-H-I for case 2, and K-L-M-N for case 3). The first two columns for each case (e.g., A and B) are corresponding to alpha=1/2, and the last two columns (e.g., C and D) are corresponding to alpha=1/4. The first column contains the maximum relative magnitude error (delta_r), and the second column contains the maximum relative phase error (delta_phi). [file peerj-cs-10-2341-s004.xlsx]

## Sheet: RCGA
-12.71	30.71	-25.17	6.88		-19.74	5.2	-19.01	8.58		-29.26	5.3	-20.77	7.55
-8.3032	22.0831	-24.436	9.7421		-19.2087	5.1341	-11.1017	7.8649		-19.4939	7.4396	-11.7372	13.1895
-11.219	15.7081	-18.4138	7.1123		-12.7743	5.8245	-11.1467	6.3213		-20.5395	9.7839	-15.012	12.4888
-10.8814	15.2351	-15.3042	8.3097		-17.8112	9.1683	-11.7871	7.0478		-27.9237	9.3846	-14.8755	9.8514
-7.2932	18.5863	-17.1544	8.8873		-18.1457	4.375	-14.1206	7.2228		-15.7819	7.8777	-20.4664	10.8444
-6.6982	24.4615	-23.751	6.9641		-17.2517	7.344	-14.1581	9.686		-16.6518	4.9648	-14.6396	7.0572
-9.8284	27.8814	-18.6731	7.3186		-18.8738	9.9176	-12.4972	5.9478		-19.4258	4.5011	-19.3803	13.0822
-8.3136	10.4726	-24.3394	4.6545		-13.9011	7.6857	-13.3198	6.662		-27.4766	7.2897	-17.3214	11.9573
-8.6627	17.6996	-18.2843	6.9865		-14.4794	7.0301	-11.0808	4.4088		-21.6075	7.9299	-19.1868	7.792
-6.2621	16.1963	-20.0378	5.8178		-15.929	6.0785	-12.2325	7.4412		-25.4798	6.7905	-10.7418	13.4812
-11.8776	21.0035	-20.6631	5.0139		-18.7478	7.8017	-14.5971	7.5154		-25.241	8.6396	-11.7482	7.9694
-11.9007	11.137	-20.6902	8.3892		-16.97	9.2252	-16.2075	4.8721		-18.1202	7.5286	-13.5384	8.3106
-12.2566	13.423	-24.8038	8.1409		-11.3709	5.3836	-17.411	4.3869		-22.0649	6.4176	-19.459	9.365
-6.9134	28.4753	-20.9252	7.8545		-10.5215	8.5896	-16.0999	4.4281		-20.4398	9.0277	-17.3311	13.568
-11.4705	21.3389	-20.1474	6.8783		-18.636	4.7163	-10.976	5.3965		-18.1541	5.9924	-20.716	8.5098
-8.0188	18.1475	-22.1411	5.3567		-18.2438	7.0636	-17.714	6.7558		-27.2239	5.9332	-17.21	9.8758
-7.8797	11.7431	-19.8161	5.4264		-18.3825	5.1331	-10.6676	7.3491		-18.2904	9.2752	-17.7158	8.0883
-11.9468	8.4692	-18.6891	8.4305		-10.5909	5.9212	-10.7566	9.9698		-28.9456	9.1892	-10.2578	11.2489
-8.7196	11.5688	-19.369	4.0624		-13.1645	4.8753	-13.4018	8.2584		-23.8831	8.7742	-20.512	10.152
-8.622	11.3058	-24.7283	4.2104		-17.3223	8.8662	-17.1381	7.3886		-15.8198	6.2228	-11.8486	10.8692
-7.1303	30.386	-24.1117	8.816		-19.6005	6.6196	-18.5697	8.3382		-24.0245	5.6264	-18.6268	9.159
-7.7736	27.1661	-19.3083	6.0347		-13.7405	7.6803	-10.3054	9.095		-17.2448	4.0279	-13.6677	13.8144
-8.3148	12.5415	-22.7622	5.8981		-10.5973	7.4061	-16.9418	8.2374		-21.7243	8.906	-16.0114	12.0584
-9.3758	29.2034	-20.7823	4.0124		-19.4235	6.9623	-15.3631	8.4022		-28.1386	4.7257	-12.7658	7.1829
-9.3887	25.5739	-16.5432	5.1464		-18.4803	5.6451	-18.3175	5.8918		-27.2558	4.6549	-14.6852	13.1885
-6.5887	6.7025	-21.9836	6.7495		-15.3846	8.5758	-16.4154	9.1917		-24.4053	4.017	-20.171	8.9017
-7.1288	17.3228	-17.8704	7.8823		-14.4796	8.3843	-16.8015	8.5659		-24.8315	4.0224	-15.0828	11.6087
-12.204	21.0596	-20.2232	4.7028		-11.0211	9.4843	-14.0571	9.5837		-18.3453	9.7741	-12.9422	13.9874
-7.0724	25.7289	-22.4023	7.2876		-12.0627	5.5918	-16.8656	9.6641		-17.1135	9.8152	-10.995	11.5901
-9.16	17.229	-22.5549	4.3243		-10.6043	7.1323	-12.9878	9.4678		-25.1626	9.8292	-19.1407	9.4149
-12.4521	24.0016	-17.5666	4.9137		-15.4885	4.8509	-15.5841	4.027		-27.8063	6.9812	-14.7721	13.3556
-12.0812	12.8729	-21.133	5.9562		-10.624	9.8686	-15.8817	5.7343		-16.9846	8.8324	-18.4831	7.0281
-11.5161	15.7922	-16.8131	9.0105		-19.6086	9.2975	-14.8657	8.8287		-17.8482	7.9355	-15.5349	11.3127
-10.6847	13.7952	-18.6264	9.6802		-12.5499	9.1768	-15.7966	7.7527		-28.3398	4.0903	-10.3108	7.5015
-12.5232	7.7368	-20.0785	9.1684		-14.9017	4.2479	-15.0778	9.7025		-16.462	9.8231	-13.2866	11.9871
-8.1021	24.978	-15.7601	8.4436		-12.7652	5.8828	-14.0384	7.1015		-18.7506	9.1111	-14.8854	8.3963
-12.2972	5.4609	-22.6364	6.4831		-12.3017	7.1207	-15.3271	9.4731		-26.8733	4.5931	-15.2461	12.4612
-9.5913	14.3262	-15.3773	4.3579		-14.6986	6.4017	-18.8324	8.0206		-27.2998	4.7136	-12.9546	10.3144
-10.12	20.0087	-16.2416	4.4623		-11.0606	4.9429	-18.7317	6.0179		-25.4087	9.7487	-17.6752	9.1607
-12.5551	12.563	-23.6126	9.9155		-10.4749	7.2851	-14.9559	9.9219		-24.3811	6.3655	-16.356	11.0929
-9.9901	10.826	-16.6092	7.7804		-13.6508	7.6633	-18.1246	7.1		-21.2404	8.5628	-16.2245	14.4648
-11.9456	14.5857	-23.8151	5.8146		-17.8108	6.4973	-14.1785	8.5254		-18.5149	5.2825	-15.22	8.0673
-11.8949	11.6934	-16.9604	7.1719		-19.1727	4.233	-11.9624	6.1253		-29.1265	8.0676	-17.9646	12.0921
-8.1193	27.064	-16.8916	4.6906		-13.6183	8.5171	-12.0695	9.0846		-28.2785	9.4587	-17.0781	7.2689
-8.9823	28.6592	-15.8982	9.3816		-19.4069	8.3974	-14.9686	4.8393		-19.5353	5.2204	-10.2489	13.6227
-12.1058	21.0562	-17.6245	6.3175		-10.0055	8.3104	-11.3418	5.5909		-15.3465	7.3447	-13.1581	10.698
-12.1274	20.1073	-22.9589	5.6347		-16.5491	5.3008	-18.9649	7.0846		-23.1835	9.7577	-16.9769	13.8797
-10.3515	19.1916	-17.5223	9.6045		-14.7289	4.1815	-16.3356	7.6511		-24.3908	8.9178	-16.6513	9.1238
-8.397	27.0341	-24.6979	7.7457		-15.4147	8.3007	-13.1245	4.7765		-18.3426	4.4015	-12.0306	8.2354
-7.4296	11.4974	-22.5465	7.1539		-12.5021	9.2843	-11.1112	5.2051		-23.4991	4.1664	-19.3835	10.8073
-11.9036	10.8355	-18.1835	8.5609		-19.1081	9.0067	-15.0636	4.4414		-19.7091	5.7468	-10.617	12.1134
-10.2818	7.3203	-21.3369	9.3224		-17.8527	8.3128	-15.4638	5.3617		-15.5258	9.6059	-18.2852	11.6243
-8.9509	29.8343	-17.7256	9.3417		-18.213	9.3962	-16.9731	6.4131		-28.3929	8.594	-13.3876	12.61
-7.9504	17.7165	-24.6359	9.7061		-12.2458	6.5269	-14.1243	4.5832		-17.8183	5.0497	-16.6403	12.994
-11.5393	15.2266	-23.4887	8.0744		-14.0173	6.8849	-11.9272	5.2174		-15.7293	7.3457	-15.7258	11.7157
-8.5128	9.7637	-15.6109	5.8053		-18.3149	6.8877	-12.9733	9.0917		-23.9781	8.6912	-13.8006	13.0865
-12.2641	14.6585	-24.6487	8.3206		-17.4084	7.4462	-10.9165	8.0653		-20.1757	6.4096	-15.2765	11.128
-7.3884	20.4448	-18.7224	8.2672		-12.7813	4.2247	-12.8092	6.6992		-27.9009	9.5182	-15.5429	7.9445
-6.3224	10.1316	-23.3052	7.1707		-11.8482	4.5713	-18.8292	4.9101		-21.6882	8.361	-13.21	13.5772
-7.5287	30.3992	-16.7512	5.9735		-15.0573	8.2587	-17.8741	4.8691		-17.0761	8.6297	-14.8227	12.9177
-7.588	19.7164	-24.1153	7.8412		-12.0007	7.6152	-12.1497	9.5033		-18.1597	4.1591	-15.2361	10.2744
-10.8231	5.2896	-17.4038	5.397		-16.2887	8.7568	-12.481	8.6282		-26.0085	8.1626	-18.6004	12.2582
-10.9916	25.7091	-21.4095	7.3731		-10.8453	8.7687	-18.2035	8.9007		-23.6175	5.2711	-12.9053	11.7201
-9.6315	22.8773	-15.2793	6.5834		-13.3806	6.2316	-13.8643	9.3246		-21.2325	6.8291	-15.4736	10.4081
-9.3987	18.3116	-19.7672	8.8025		-10.6373	7.1786	-11.9449	7.2127		-28.42	8.004	-18.731	11.6593
-9.7357	5.4338	-21.2002	6.1995		-10.4085	6.3573	-10.9739	7.9454		-16.2898	7.2969	-13.8463	9.5273
-10.9992	6.6101	-18.7982	7.2169		-14.2935	5.8037	-18.4666	7.1959		-24.362	8.8493	-18.061	7.09
-8.6661	11.4662	-19.0574	6.537		-10.7611	4.0434	-15.7302	5.1362		-15.1064	9.1663	-12.178	12.128
-7.4572	20.7493	-18.5848	4.5587		-18.8791	8.4787	-13.2073	4.5417		-22.9513	4.301	-16.7259	10.7874
-11.2077	7.5653	-17.4119	6.5747		-15.558	8.5016	-15.8133	5.7068		-21.7463	5.1409	-17.9627	14.9672
-8.0609	25.8434	-20.6344	9.3257		-12.9273	6.3965	-13.2556	9.5474		-19.5083	7.7977	-11.696	7.5405
-6.6105	6.2055	-15.8628	4.6861		-13.2294	4.2079	-11.1918	9.98		-28.14	9.8853	-14.882	12.9413
-11.9198	18.2366	-21.3713	9.832		-16.5097	9.0504	-10.3214	4.7471		-28.2575	8.0718	-14.9998	12.5035
-8.7846	5.4205	-17.1208	5.0613		-10.9917	8.4539	-12.392	4.3809		-19.8761	8.6977	-12.1394	13.4995
-10.0475	8.6695	-21.5094	7.2073		-10.8316	8.0667	-14.1878	7.8784		-28.3318	4.5439	-19.0332	12.4032
-8.9873	14.0878	-19.709	8.4731		-16.5051	5.7432	-14.3002	6.9231		-26.3116	5.4639	-16.5007	10.3365
-9.7622	14.5344	-22.8819	7.4401		-12.3909	5.4362	-11.6229	6.2369		-17.5968	4.4858	-13.9843	12.894
-8.5346	7.0645	-17.637	8.9077		-17.3643	5.1176	-10.8208	4.4397		-28.6495	7.5896	-15.2005	9.1169
-10.9893	26.0729	-21.2641	8.9753		-19.508	8.1856	-16.5046	7.0824		-21.5193	4.8623	-17.568	13.1314
-8.0836	24.291	-18.1319	8.5003		-13.6343	9.3927	-14.4322	8.4448		-25.5601	8.6847	-14.0732	11.1966
-10.7221	30.3827	-20.7983	7.7156		-15.4693	5.0981	-15.98	6.8823		-21.3488	6.2811	-15.5943	12.3171
-9.2737	5.5993	-22.2986	7.6517		-11.6156	7.6495	-15.7113	5.9751		-19.6727	5.7644	-14.3598	11.4384
-6.3623	25.9078	-18.1411	7.2017		-15.357	6.0269	-18.1668	7.7664		-27.2594	7.6752	-15.8465	7.662
-7.0925	20.8455	-23.3273	7.0534		-14.9912	5.5287	-18.8605	5.4244		-22.237	7.1248	-20.0825	13.5824
-10.0598	12.2712	-18.4449	6.7282		-15.943	6.8196	-14.3625	6.2112		-23.2966	6.8503	-20.2988	11.1927
-10.0588	7.5812	-19.7007	7.9916		-11.171	7.8417	-11.7828	5.3637		-17.6343	8.9096	-19.6336	10.9315
-10.1117	16.3687	-22.2326	4.4968		-17.8052	8.1112	-16.6652	4.3332		-29.1656	5.6067	-13.9236	14.9967
-9.994	17.2247	-17.5737	7.1259		-17.4306	7.0368	-16.7046	8.6145		-27.2271	4.3236	-11.1441	14.2253
-8.1899	12.1879	-24.3496	6.6744		-12.4826	5.8771	-18.5379	6.9126		-20.2525	4.8474	-10.3607	10.3731
-10.2508	16.9091	-22.6222	9.898		-18.2681	7.8316	-10.8251	9.673		-18.7556	8.4455	-18.9982	8.9967
-11.7692	17.9153	-16.0564	4.7368		-14.0768	8.6432	-13.6983	4.5611		-20.63	4.7125	-10.6531	11.1624
-7.9979	7.5875	-19.7855	4.724		-11.6915	8.1482	-16.115	6.3614		-21.0283	9.0112	-20.6172	9.0372
-9.6628	25.0283	-21.0729	5.0259		-17.5605	6.7648	-16.1323	4.9868		-27.7091	5.2423	-15.9033	7.7084
-7.6221	17.2322	-21.6318	9.0795		-10.7541	5.8058	-10.133	5.2895		-19.8266	7.4905	-18.0044	10.8466
-12.3366	28.9826	-20.9711	8.0489		-15.3438	9.8134	-17.212	9.409		-24.9138	9.4977	-10.0104	13.964
-9.5919	5.2449	-20.0447	5.592		-14.9338	6.5597	-18.9947	9.788		-22.2185	4.7813	-12.1348	12.3795
-11.7689	13.5298	-15.283	8.5203		-12.0917	6.8802	-11.7443	7.9041		-24.548	5.3422	-10.5043	12.3889
-6.0175	8.3764	-16.1156	4.7133		-14.4694	8.6879	-17.8655	7.6664		-20.0537	4.481	-19.5604	10.5139
-7.2651	26.9895	-18.4922	9.7222		-18.4229	7.3337	-17.6551	9.8841		-25.7115	7.0016	-15.0769	9.3086
-11.0996	24.7527	-17.6049	8.1781		-12.8614	6.939	-16.3221	9.3984		-16.9922	5.8966	-15.6818	8.2778

## Sheet: PSO
-29.8	3.47	-23.8	9.4		-23.16	3.8	-34.68	6.47		-20.31	4.51	-26.93	14.95
-26.1523	7.305	-16.6535	8.7762		-20.7905	4.0078	-26.1649	7.4081		-18.7595	5.5162	-20.8066	9.2529
-24.2086	3.5086	-23.1892	4.6756		-16.6295	4.6872	-32.2024	4.7807		-17.2439	5.1975	-24.0183	7.0818
-24.3431	7.3821	-18.7145	7.6136		-17.8795	3.0911	-30.9783	9.9995		-17.8719	3.1649	-26.5526	13.6761
-22.1032	5.797	-18.5989	9.3669		-18.6476	3.4277	-25.428	9.8362		-19.3891	4.3074	-18.9771	9.5144
-25.4887	11.643	-22.9784	7.8496		-16.5281	5.1588	-21.7283	8.985		-15.8986	3.9072	-19.9783	14.7478
-29.4067	4.4538	-19.3427	7.152		-18.8706	3.7425	-24.4906	5.1393		-16.5611	6.0902	-19.537	10.5813
-16.1174	4.3935	-22.8465	4.5332		-22.8551	3.5332	-22.4874	9.8854		-19.5511	4.0394	-16.4048	7.6612
-20.3092	12.2081	-20.038	4.189		-22.2598	4.5084	-31.9292	7.0465		-16.4166	5.1314	-23.6607	12.3246
-25.9552	4.1124	-22.8775	8.9535		-18.1759	7.5897	-21.1882	5.1018		-18.5286	3.8707	-14.1137	8.6994
-29.6395	3.9541	-19.4076	8.8533		-17.8902	5.1432	-20.8786	7.9273		-17.8102	7.4194	-19.7132	13.7929
-25.4586	4.658	-19.4271	7.8289		-20.5629	6.8102	-29.9422	6.7546		-15.6192	6.9937	-26.7859	10.3615
-27.4267	14.6206	-21.3748	8.0218		-20.7633	4.2879	-26.0985	7.9357		-19.3512	4.2892	-18.2257	14.7791
-19.1713	7.4698	-17.6728	9.5112		-22.2783	7.0802	-31.2053	8.3596		-19.8358	4.0556	-18.3532	14.5252
-29.4803	12.1714	-15.9315	9.1884		-19.5294	3.1495	-23.8402	4.6413		-15.2681	3.9232	-19.4996	10.6257
-16.2464	13.1321	-22.1159	6.0686		-16.2897	3.1902	-33.5712	5.4091		-18.5116	7.8161	-26.6668	13.6078
-22.2787	6.3589	-16.739	4.5866		-22.4343	7.7432	-31.8008	7.1058		-18.2362	7.471	-15.1903	8.5315
-19.562	10.7699	-23.1689	5.806		-21.6332	3.7645	-22.7373	9.7446		-19.0925	5.8511	-24.569	8.0295
-26.8023	14.717	-17.7922	8.7836		-17.6472	7.5201	-27.2414	5.7902		-19.1861	6.0066	-23.4061	7.4437
-21.8144	9.2505	-16.55	6.9862		-18.8923	3.6202	-23.5662	7.582		-19.9417	6.6828	-24.6964	9.232
-22.9097	8.6254	-22.3678	6.5757		-22.1374	4.4293	-20.9686	5.1761		-16.0509	6.8591	-26.342	10.2987
-24.8993	9.4927	-18.3713	6.0783		-22.672	4.7638	-30.8037	8.3603		-19.2549	4.262	-15.7957	7.1077
-17.6918	10.7027	-23.6257	7.9534		-23.1116	5.3453	-29.107	7.3084		-20.2565	7.1636	-16.5398	12.7271
-28.3753	3.5468	-17.3868	7.229		-16.8065	5.8753	-25.762	5.2636		-15.9416	7.4827	-20.9416	11.4976
-19.0147	12.6352	-16.1077	6.4205		-16.8341	4.4407	-23.9784	7.2287		-18.1108	4.8622	-15.6537	10.6546
-25.7151	14.7342	-17.785	8.0807		-18.4516	6.9718	-27.0932	5.6288		-19.0137	5.2973	-18.4346	9.4563
-16.7343	8.0734	-21.9877	4.6747		-23.0664	7.0939	-23.7695	4.2192		-19.9914	5.67	-23.3922	8.3241
-25.7713	3.2171	-19.3119	5.5618		-17.8676	4.5097	-27.5656	8.3298		-17.4829	6.6971	-15.7448	7.8187
-22.6917	9.389	-20.1741	7.0123		-17.9998	6.6882	-22.0823	9.2291		-18.4869	3.461	-19.4688	7.49
-23.7805	6.8856	-17.8218	5.453		-20.0564	3.5319	-31.7153	8.691		-16.8159	3.9259	-14.0405	14.2199
-29.1621	3.9592	-19.1891	6.4811		-17.1625	7.3109	-31.4884	8.4937		-15.5377	3.8036	-25.7003	12.4538
-19.2353	3.9337	-20.5777	9.2456		-20.9976	7.5673	-26.5792	8.093		-15.2645	6.4006	-24.5789	8.1078
-18.6586	6.6203	-22.8707	4.5191		-22.5109	5.5134	-28.4436	5.9798		-18.6036	4.7505	-20.81	14.4386
-25.5102	12.1355	-23.6121	6.4238		-19.0795	3.0156	-29.2633	4.3921		-15.8008	4.3139	-14.1754	14.9242
-22.5247	10.9246	-16.3213	7.4168		-19.8554	3.3081	-26.8875	9.6793		-19.8451	4.9339	-19.8431	14.7923
-16.1503	4.8505	-22.5298	8.6777		-19.3272	6.5552	-25.0239	4.3503		-18.4517	3.1885	-16.5099	13.0868
-16.2187	5.1815	-16.208	7.0389		-19.0044	6.9335	-31.851	9.768		-17.2146	4.1173	-22.5219	10.4319
-23.3023	13.2153	-17.0247	4.8312		-16.6849	4.0732	-23.7493	7.6187		-17.8004	7.0569	-25.4763	11.9812
-25.5053	11.7127	-15.5028	4.3138		-21.1713	4.3574	-29.685	8.6803		-18.246	3.4513	-18.897	9.8041
-19.5997	11.2713	-22.8897	5.4752		-20.057	6.8945	-31.4818	6.3186		-19.9949	3.2915	-26.4092	8.4298
-26.1445	5.5308	-20.4566	6.1289		-21.5518	5.0874	-26.8306	7.3102		-15.5125	3.5251	-14.7573	11.3874
-18.8983	12.0273	-17.4642	9.0712		-21.6417	5.2343	-22.4341	5.6392		-15.26	6.9533	-17.3345	14.4559
-19.9461	9.4061	-18.1092	6.8159		-21.884	4.8716	-28.0742	8.4514		-18.3944	7.3877	-23.9699	7.5074
-16.4838	6.0429	-18.8085	8.2845		-22.126	7.6889	-30.553	7.365		-18.3534	7.4228	-20.0094	13.7671
-23.6968	3.4769	-16.7145	9.7134		-21.3875	7.6488	-31.9598	8.8663		-19.4133	3.5043	-23.9184	11.5614
-28.5651	11.1072	-19.9111	6.4766		-19.7403	7.9843	-28.3592	5.828		-15.9402	5.3429	-14.2324	10.5148
-26.231	6.4466	-19.7323	5.2778		-19.4927	3.2084	-29.472	7.8801		-16.8931	6.2405	-22.5801	7.5779
-19.8483	13.3387	-19.6252	9.3302		-21.675	5.1887	-32.4306	4.6948		-16.5327	3.7556	-23.3915	9.006
-16.2433	10.4451	-20.7501	4.3275		-17.8664	5.5866	-23.1416	7.0688		-19.2002	7.7281	-17.7053	12.541
-23.947	9.5853	-22.748	5.5272		-21.3944	3.3768	-24.6893	8.2252		-19.4835	3.7411	-25.2238	14.4605
-21.7015	4.4155	-18.4566	4.6441		-17.4827	6.7765	-23.3204	8.8107		-15.2116	5.3974	-25.7488	9.7556
-28.689	5.1771	-22.8391	4.2831		-21.0151	4.7015	-31.558	9.2729		-19.6069	3.2932	-15.3315	10.9416
-17.8327	12.064	-20.2145	6.7585		-20.6557	3.7135	-26.7567	8.0075		-16.6967	6.4741	-26.3452	11.0381
-23.201	3.3726	-16.5301	9.2459		-20.7229	4.2714	-21.7535	7.6624		-17.5117	3.7192	-24.6958	13.2146
-29.0091	6.031	-21.8418	9.2218		-22.194	3.2271	-31.7812	8.8909		-15.8735	7.7729	-15.4851	14.7512
-27.8691	9.5739	-15.4037	7.9543		-19.7418	3.5571	-28.1487	6.2023		-16.7156	6.5696	-26.419	10.6781
-27.4777	13.9617	-15.8086	6.5692		-17.9051	7.7012	-29.5583	5.5873		-18.7946	3.1598	-25.9626	8.1609
-29.2438	8.9581	-23.1382	9.1327		-22.7091	4.6842	-30.3192	7.9791		-17.3294	3.768	-17.9396	11.5036
-18.6242	5.8887	-21.8578	7.9577		-16.3342	3.3615	-22.6149	4.6635		-16.8877	6.1629	-24.3778	14.4777
-28.2898	9.0044	-23.0356	4.8862		-19.2242	6.1512	-21.5925	8.63		-19.9036	3.6776	-23.4208	9.78
-18.1216	9.1089	-21.5403	7.2538		-20.276	6.7165	-28.6871	8.7205		-18.8053	6.0788	-15.2611	13.9002
-28.2743	11.4273	-20.4675	6.1717		-20.6552	3.6913	-31.8969	5.8469		-19.7409	5.9206	-15.8231	14.78
-23.8455	6.1273	-19.7892	4.6647		-18.3241	5.2004	-23.237	8.384		-17.9471	4.2965	-20.646	7.4706
-18.0643	3.401	-15.7402	5.8061		-18.9401	5.7535	-30.4761	9.4039		-15.0557	3.7314	-18.2023	14.1362
-18.7395	11.7611	-18.125	9.0622		-17.0481	6.0735	-24.1019	5.9455		-18.9382	7.5014	-20.2977	13.5344
-17.2991	3.5727	-17.7252	9.0122		-21.1893	4.9944	-28.0419	4.1112		-16.1481	4.6931	-26.862	13.767
-17.9578	11.6223	-22.873	9.5631		-17.0015	3.7996	-32.3759	4.2694		-19.3999	4.1314	-20.5396	12.9587
-26.0921	8.8173	-19.2586	8.5708		-20.2082	4.5221	-29.831	5.5049		-17.152	6.571	-19.8205	12.9777
-24.3095	13.8593	-22.6334	7.6403		-17.8729	7.5344	-27.0204	6.0444		-16.5868	4.7201	-16.7267	12.5736
-29.7284	11.638	-20.4573	8.5874		-17.4864	3.8884	-26.9447	7.7887		-19.61	5.0391	-25.3512	7.1531
-29.7871	8.5204	-16.8559	4.9552		-16.7524	6.1863	-21.546	5.0039		-17.0949	7.3794	-25.3588	12.256
-23.2154	8.8834	-20.2331	8.5959		-16.5904	4.9912	-30.5254	5.1272		-19.0961	4.0697	-22.0502	12.2731
-25.301	14.5994	-23.6301	7.6044		-22.5726	5.1228	-20.6244	9.6173		-19.9226	3.3798	-16.6189	8.9197
-21.9348	6.2542	-22.7205	6.5785		-19.379	6.4778	-34.4099	9.7538		-18.9597	5.5383	-23.9462	14.8288
-19.5237	6.5512	-21.4336	5.6294		-21.9672	7.928	-23.4	5.985		-16.2073	4.274	-23.1559	9.9951
-24.9077	11.2269	-23.1355	5.2581		-19.9648	7.4626	-32.9474	4.9087		-20.2239	7.9452	-18.3851	14.3222
-17.4633	11.5087	-16.3745	9.1598		-20.9581	4.08	-26.0667	6.1473		-19.1937	6.9056	-25.4004	14.0009
-24.2831	13.5658	-17.6574	9.2519		-17.3941	6.336	-20.309	4.7648		-17.7728	4.8862	-26.6203	7.4506
-21.9256	11.0402	-15.7516	7.3422		-16.1835	6.7521	-22.46	7.4466		-17.9113	6.0918	-23.1218	10.4549
-17.0473	3.8712	-17.1571	4.8225		-19.3663	3.9651	-21.4719	9.7766		-16.5591	5.2411	-24.3937	10.2529
-20.547	9.1307	-20.6884	7.5344		-18.3595	3.8115	-22.7173	8.6214		-17.2972	7.5496	-20.3266	8.2804
-28.7332	7.4249	-22.7374	7.3823		-18.5769	4.3177	-28.5595	7.5913		-18.327	6.1843	-22.8809	10.4313
-19.1121	3.5689	-22.5019	4.4193		-22.8173	5.8673	-29.5008	9.7332		-20.0827	6.1597	-24.8045	10.5238
-22.5543	12.9448	-19.7196	9.9436		-21.5603	7.3845	-23.3195	9.1061		-18.0029	3.2906	-22.0444	10.0411
-22.6471	9.2841	-18.6183	5.2646		-20.3027	7.6813	-30.1203	9.8015		-18.642	4.6019	-26.0883	7.5659
-18.137	8.5808	-22.4736	9.8557		-18.3673	4.7538	-31.6416	4.8886		-19.4579	4.0952	-25.428	8.7118
-23.8223	11.2302	-19.1513	7.5393		-18.4104	6.1807	-33.8273	7.612		-18.6099	7.9161	-26.8524	10.2567
-28.8718	13.2738	-22.8101	9.4639		-21.5406	5.0817	-31.3235	5.4649		-20.16	3.0752	-24.9934	8.1477
-28.3997	11.733	-19.7711	6.941		-21.1017	3.0107	-29.6407	4.2827		-15.642	6.5244	-14.3695	8.3494
-27.565	13.7574	-21.3368	9.0558		-21.3846	4.4986	-27.062	4.2422		-17.6638	3.9971	-22.9573	7.2892
-22.6809	13.3686	-16.1292	8.4488		-16.6173	7.9597	-27.2032	5.548		-17.1967	5.9273	-15.0218	13.8448
-17.3868	4.3367	-17.6743	7.6432		-22.0806	5.1599	-28.231	6.1486		-18.3821	4.1616	-24.9155	11.4129
-20.9119	8.5069	-21.2872	6.2193		-19.1781	3.3084	-22.024	9.8987		-19.2765	7.9166	-18.9054	14.6149
-25.2672	5.1286	-17.6913	7.325		-19.5017	6.2389	-27.4352	5.2591		-19.7035	6.8928	-19.5114	7.2429
-26.4723	10.2674	-19.9578	9.0048		-21.0147	6.4518	-28.702	8.649		-15.6766	5.8621	-21.9029	13.6405
-18.0976	4.8125	-18.6963	9.1187		-18.9985	7.0726	-26.0569	8.9322		-16.5936	7.5072	-19.846	10.9165
-21.073	6.2746	-18.9194	5.5106		-19.1523	6.0813	-25.1522	9.6146		-15.4067	3.3075	-20.4553	14.5207
-26.4551	9.9377	-19.113	9.5016		-21.494	6.9254	-22.3985	5.5393		-19.6814	5.7498	-22.3909	7.2882
-22.8286	12.1871	-19.5683	8.7693		-22.889	6.0141	-28.5551	8.9684		-17.1841	6.8916	-18.0939	10.211
-16.48	5.2194	-18.1794	9.6915		-19.0504	3.5068	-23.5833	9.3582		-18.0709	5.5131	-21.4219	14.7298

## Sheet: GBO
-35.37	3.23	-34.82	8.17		-33.78	2.38	-33.65	8.17		-36.99	3.02	-38.37	8.17
-35.1351	5.0886	-31.0846	9.6502		-29.8317	3.2824	-32.3811	9.5783		-34.7311	3.9467	-37.7414	10.1559
-33.2201	5.2125	-29.2027	8.2783		-27.4677	5.965	-28.5042	6.5266		-35.4573	5.8632	-37.1765	11.5801
-34.0057	7.7174	-33.0672	8.0045		-27.6286	4.9136	-29.7335	6.655		-33.2766	3.6535	-34.5531	10.1803
-31.0465	6.4809	-32.3085	5.0665		-27.4686	5.5337	-28.5698	9.5551		-36.6067	3.6654	-35.4354	9.66
-30.7197	4.5318	-29.9943	4.9098		-30.323	4.5517	-28.9707	6.7425		-34.8157	3.531	-37.5438	8.3163
-32.1009	9.7002	-32.0109	6.3914		-28.7759	2.3939	-29.3323	4.0603		-34.9421	6.1079	-35.7594	11.4892
-33.1603	9.5289	-29.4818	4.7078		-32.132	5.1113	-31.7118	9.2479		-31.6807	4.073	-37.8405	8.1468
-30.9123	5.8639	-33.8113	5.8905		-31.1901	3.631	-33.4254	4.2849		-33.0096	5.1862	-34.9424	8.4523
-34.6928	9.4189	-29.2485	8.1492		-30.2007	3.5717	-30.6956	9.9631		-36.5213	6.1961	-35.9452	11.1949
-30.0082	3.6249	-33.3032	4.4308		-27.719	2.835	-28.9874	5.9381		-32.4525	6.6543	-34.7163	7.0014
-31.4693	9.3259	-31.0467	5.2297		-33.5641	5.5926	-29.0778	4.0351		-32.3043	6.1936	-34.2906	7.7294
-31.4872	6.9027	-29.2021	8.4544		-30.18	4.1276	-33.1886	8.201		-31.8302	4.6143	-35.825	8.0744
-34.8478	9.1217	-32.2512	9.6737		-26.8388	5.6898	-28.6888	8.0747		-32.6646	4.901	-37.9767	10.6713
-30.9449	6.0407	-32.6918	7.5554		-28.8271	2.4061	-33.1861	7.5842		-31.8732	3.6419	-36.6016	11.9109
-31.2119	8.3189	-29.7353	8.0635		-31.9411	2.3843	-30.8436	4.7862		-33.423	4.5588	-38.1379	9.0959
-34.523	4.1855	-30.0285	4.9588		-31.927	3.7526	-32.6	9.7761		-36.8434	6.4627	-37.8703	7.0528
-31.4748	3.405	-31.5714	4.0199		-28.6676	2.62	-30.8422	4.2136		-36.5519	6.7118	-35.4129	9.2839
-32.7446	8.9053	-31.216	9.0841		-30.4301	4.1898	-29.5284	9.1039		-34.0947	3.958	-35.9156	7.1631
-31.7935	8.8038	-33.7772	5.7348		-27.1218	3.9148	-28.9051	5.194		-33.1412	6.7234	-37.1491	11.2157
-32.4361	6.2855	-32.1962	8.1667		-28.9805	5.8177	-33.304	6.5044		-36.0032	4.5387	-36.1933	11.0658
-34.6385	9.9493	-31.644	4.8821		-30.644	2.6955	-29.4724	8.7938		-34.5078	5.3825	-36.1896	8.9895
-33.0817	6.4347	-31.4026	8.4608		-32.5934	4.2494	-31.0476	9.865		-31.0995	6.2148	-36.8203	9.0272
-34.0074	7.312	-29.5195	5.4571		-29.439	4.694	-32.1492	5.7672		-33.456	4.0632	-36.0968	11.1714
-33.6731	4.8895	-31.1649	7.8337		-29.4514	3.2773	-28.598	4.7019		-34.4969	5.0397	-36.3062	11.3613
-31.8953	4.4964	-33.9067	9.152		-32.8805	3.8353	-33.3845	7.4162		-34.3239	4.4838	-38.207	9.9082
-31.5941	5.5049	-31.8231	5.7509		-33.6111	3.5291	-29.0601	5.5356		-36.8134	5.3521	-34.9697	9.838
-30.564	3.8053	-31.4246	6.6228		-26.7446	2.8973	-29.5797	5.3352		-33.9316	4.6541	-34.6479	11.8987
-33.6648	4.9006	-29.6421	6.7296		-31.7483	5.1117	-29.2554	4.8056		-35.4683	4.4995	-35.6633	10.899
-31.8457	6.1146	-29.8837	9.7315		-27.9651	3.2043	-28.158	7.8966		-36.0542	4.9149	-38.1392	9.4976
-33.3493	6.3576	-30.3857	5.2516		-28.3936	5.2151	-33.1347	7.4566		-34.2092	4.6276	-37.4791	9.4067
-34.5614	7.4347	-32.1979	9.2983		-27.7911	4.3979	-29.5721	8.3119		-34.0454	4.879	-35.1204	8.3977
-34.8531	7.0304	-32.7761	6.1633		-27.8874	2.558	-31.3232	4.2997		-31.8342	4.4246	-37.85	11.8436
-31.9012	6.3347	-31.5889	8.8313		-32.953	5.1956	-33.1909	9.5718		-32.2993	3.0903	-36.7519	7.3405
-32.7864	8.9996	-34.1462	9.244		-28.0801	3.725	-31.725	4.7852		-31.8851	6.3595	-37.0302	10.4729
-31.3045	5.0276	-30.3454	6.3885		-31.3774	3.2938	-32.091	6.0311		-36.4124	5.9302	-37.7714	11.0057
-35.028	8.945	-32.4986	8.4683		-30.9585	3.74	-29.3084	5.0665		-33.7297	3.2456	-34.3248	9.4008
-34.9206	5.152	-33.0123	5.7718		-32.5316	5.8105	-30.8124	7.5124		-34.0398	4.6826	-34.2938	7.0543
-35.32	4.2289	-30.2862	4.8009		-26.2396	5.8608	-32.892	5.364		-32.3637	5.7692	-37.4116	8.9756
-32.3681	5.5574	-29.6088	8.5147		-31.5663	2.4803	-30.7768	7.8339		-33.9507	6.6495	-34.1448	7.4508
-35.0676	8.0092	-30.4829	8.4349		-32.8824	5.1033	-31.4648	7.3454		-31.4944	3.8425	-36.895	9.1695
-32.6865	7.833	-31.0783	8.5948		-33.6721	2.7799	-29.6824	7.4302		-35.3008	6.9504	-34.0237	10.8456
-31.4295	8.4772	-29.0088	9.386		-26.6098	5.9294	-31.3474	9.357		-35.4249	6.1533	-34.9381	8.407
-34.2287	5.3837	-33.6669	7.3122		-27.3635	3.4665	-32.7354	8.4174		-35.9756	7.0946	-34.04	10.554
-33.4653	8.1707	-31.3884	7.9658		-26.6514	4.3252	-32.7517	5.5246		-35.2599	6.6135	-38.2491	8.0478
-32.2267	6.7205	-29.8891	6.1598		-31.0337	5.9638	-32.3516	8.0428		-36.1381	5.441	-37.4175	7.2896
-34.6831	9.2963	-30.9024	6.108		-32.8904	2.6479	-32.8316	5.2809		-32.9578	4.7515	-36.665	7.8867
-31.1381	8.5596	-32.9131	6.4492		-30.1597	5.2083	-28.8604	5.9711		-34.5678	4.7029	-37.4455	11.3411
-33.8662	3.0565	-31.7202	6.2526		-26.705	3.7823	-32.0314	4.7482		-35.5506	6.2319	-37.6379	7.8303
-32.0473	9.6179	-31.2794	7.0003		-27.503	4.0543	-30.6616	6.825		-34.3519	3.2008	-37.0091	10.7204
-31.0368	8.4056	-33.0426	7.6732		-29.5913	2.8857	-28.3657	8.4843		-33.7919	5.4859	-37.7427	9.8852
-33.693	5.953	-30.815	5.2638		-29.4689	3.9346	-30.906	8.8855		-31.7425	3.186	-37.5907	10.2743
-31.6388	9.121	-30.3269	5.4201		-28.7924	5.8156	-29.1631	4.0346		-36.2638	4.6568	-36.5823	7.4218
-33.5392	7.094	-32.2228	8.3061		-33.5003	2.6478	-32.1024	4.9545		-31.3293	4.2097	-37.478	9.2586
-30.7919	7.1083	-31.7958	4.2144		-26.5763	2.5686	-30.8891	5.8807		-32.0062	4.3773	-35.2245	8.452
-31.3864	6.0627	-31.5533	8.9306		-30.7874	3.9805	-30.1452	9.7637		-33.1029	3.0773	-36.6554	11.3991
-30.5957	3.5609	-32.3669	7.5987		-30.3253	3.9047	-28.9831	5.4417		-34.3856	4.5247	-36.9252	10.7643
-33.0312	3.6769	-33.1565	8.9998		-26.357	3.2102	-31.5349	4.02		-34.6935	6.9546	-37.5759	10.3423
-30.0508	6.8993	-33.4949	4.9276		-28.5021	5.8616	-30.8445	5.6795		-36.7935	4.1696	-34.6413	9.7113
-33.9769	4.793	-31.9297	7.8725		-28.1769	5.4344	-29.4789	6.3844		-35.9297	4.1903	-34.0405	8.4098
-33.5241	9.3192	-30.3757	4.5252		-33.6377	3.7966	-30.1245	9.5665		-36.3335	5.777	-37.1819	10.5595
-33.977	5.9759	-31.8405	9.6724		-28.1317	3.5436	-29.3402	7.902		-36.9154	6.1069	-37.1495	11.6936
-34.2225	8.2696	-32.744	9.9858		-27.5169	3.4928	-33.6292	8.2186		-34.462	4.2912	-36.4812	10.9904
-33.1249	8.1921	-30.2013	7.5739		-32.5512	5.4724	-30.9407	7.7855		-33.8302	4.6701	-38.0168	9.5479
-34.6318	7.1837	-29.524	5.6089		-31.3689	3.1183	-31.928	9.749		-34.0842	6.3002	-37.6626	8.2928
-31.5125	7.6752	-30.8551	9.669		-30.76	4.3435	-28.3905	4.4643		-35.4642	5.8768	-37.3112	10.1378
-30.4208	8.942	-32.6339	8.6676		-26.7488	4.8319	-28.5648	9.8313		-36.3252	3.6754	-35.086	11.8094
-31.454	7.0451	-31.5715	6.0804		-31.336	3.0041	-33.6342	4.6353		-32.6931	3.7367	-34.8501	8.4634
-33.3693	9.3735	-30.0245	6.424		-27.3007	2.4347	-29.9442	6.5552		-33.7711	6.7445	-36.9122	9.21
-32.0675	3.7967	-30.4523	4.8464		-31.0663	5.0892	-33.5566	6.0956		-33.7224	6.42	-37.227	9.1361
-33.2332	3.1875	-31.5407	7.6712		-30.6139	3.9767	-29.6429	7.5411		-31.6966	3.6508	-35.525	9.0695
-34.2335	4.8494	-29.2105	4.3365		-29.5777	5.8181	-29.3136	8.4319		-32.8476	4.9655	-35.1399	8.4255
-34.2361	3.5324	-32.3215	5.4088		-27.1869	2.4463	-32.3469	7.0978		-31.53	7.9664	-34.8058	7.7871
-30.9186	5.1762	-29.381	5.539		-29.564	5.887	-32.1254	8.8291		-35.5277	3.2812	-35.0156	9.5134
-32.4547	5.2243	-32.2324	7.3293		-27.4302	2.5284	-32.7337	7.8762		-35.0379	3.9713	-36.2069	8.6608
-33.6483	5.2112	-31.0065	9.9006		-30.9608	4.9587	-32.7762	6.2182		-34.3057	6.7867	-34.4548	7.536
-34.6028	4.0154	-32.2064	5.8118		-32.3012	3.245	-32.4975	7.4721		-34.3796	3.0585	-37.2039	9.1966
-32.1336	9.3473	-31.7754	6.4903		-30.7795	5.7943	-30.2001	5.357		-36.818	7.9807	-36.5025	9.9735
-34.8212	6.8759	-33.3193	4.0875		-30.4509	5.3391	-29.7245	9.522		-31.5891	4.6902	-37.1721	8.6352
-34.464	4.7713	-32.5118	5.0455		-29.8546	5.7747	-32.8332	5.6256		-32.4368	6.5916	-37.684	7.8038
-34.4	6.0935	-33.6631	6.4966		-26.0647	5.1999	-32.5146	7.3863		-35.7267	3.8736	-36.149	7.0846
-33.2879	9.9096	-29.1971	9.492		-32.0437	4.134	-28.6244	7.7285		-35.8283	7.1518	-37.1025	9.9351
-31.8527	6.4097	-31.5786	7.1801		-28.7569	4.8015	-30.6388	6.696		-35.6479	6.9456	-35.3951	8.2489
-33.4348	4.3622	-34.0969	8.7519		-28.7893	5.0166	-29.1139	5.6104		-36.0312	5.2494	-36.241	8.4567
-34.9818	6.4854	-32.0509	7.5469		-33.4106	5.8212	-31.9894	8.3945		-33.0187	3.8584	-38.3363	8.9919
-34.4686	5.2194	-31.6866	4.5774		-30.0638	3.0441	-32.5956	5.2022		-35.965	3.0627	-37.9744	11.0726
-31.9622	4.0466	-31.5995	4.5349		-28.5226	5.382	-32.6149	5.9584		-33.0431	4.7242	-38.3277	7.7796
-33.4623	9.8638	-33.507	5.5931		-28.0879	4.7881	-33.4733	6.307		-32.1051	6.2117	-36.0227	11.996
-33.8617	7.5899	-30.7226	7.8465		-29.1796	4.4097	-33.1942	5.4784		-34.3099	4.9755	-38.2888	9.9861
-31.9157	4.4972	-29.5834	5.9315		-26.1604	5.0496	-31.4845	6.9164		-34.3211	3.4748	-34.6437	9.9979
-33.3491	5.6387	-30.6895	7.618		-33.3198	2.5781	-28.243	5.7247		-33.1552	4.3588	-34.1205	10.974
-34.7626	5.54	-30.9404	7.1597		-27.4025	4.2562	-30.5956	6.4396		-33.9664	5.8531	-37.9427	10.3263
-30.3811	5.6367	-32.4412	9.9834		-27.7737	3.3131	-28.8228	4.7854		-33.339	4.3651	-36.3965	9.1875
-34.3811	9.7462	-32.9831	5.2608		-26.7837	3.4268	-32.429	5.5914		-32.5266	4.0928	-37.3423	9.9802
-31.2976	3.5499	-32.0787	6.1556		-33.0754	4.7247	-33.6168	5.3369		-35.6541	4.0812	-36.1495	10.9267
-32.0956	6.8976	-29.7252	6.7484		-32.0081	2.7403	-30.2387	8.0396		-35.1168	6.6146	-37.7699	7.0043
-33.492	3.48	-32.4078	5.1443		-30.5134	5.1811	-33.4169	8.0883		-32.0336	3.6049	-37.4571	8.615
-30.772	5.0339	-33.3211	5.1758		-31.1555	5.7459	-32.2162	9.9994		-34.4892	4.3809	-36.9885	10.1609
-32.1125	6.1454	-29.4565	9.4418		-30.6485	2.9475	-29.183	8.2118		-33.4629	4.1428	-34.0429	8.1985
-31.5295	8.5467	-31.7423	4.0688		-30.3378	5.6219	-33.4262	4.0091		-33.6395	6.5	-34.1634	7.6244
